# Supplementary material for: Conducting an ongoing HIV clinical trial during the COVID-19 pandemic in Uganda: a qualitative study of research team and participants’ experiences and lessons learnt
Source: PubMed Central journal article supplement — BMJ Open. 2021 Apr 21;11(4):e048825. doi: 10.1136/bmjopen-2021-048825 (PMC8061567; doi:10.1136/bmjopen-2021-048825), 2021-04-21
Supplement: bmjopen-2021-048825.draft_revisions.pdf [file bmjopen-2021-048825.draft_revisions.pdf]

# BMJ Open

BMJ Open is committed to open peer review. As part of this commitment we make the peer review history of every article we publish publicly available.

When an article is published we post the peer reviewers' comments and the authors' responses online. We also post the versions of the paper that were used during peer review. These are the versions that the peer review comments apply to.

The versions of the paper that follow are the versions that were submitted during the peer review process. They are not the versions of record or the final published versions. They should not be cited or distributed as the published version of this manuscript.

BMJ Open is an open access journal and the full, final, typeset and author-corrected version of record of the manuscript is available on our site with no access controls, subscription charges or pay-per-view fees (<http://bmjopen.bmj.com>).

If you have any questions on BMJ Open's open peer review process please email [info.bmjopen@bmj.com](mailto:info.bmjopen@bmj.com)

# BMJ Open

## Conducting an ongoing HIV clinical trial during the COVID-19 pandemic in Uganda: A qualitative study of research team and participants' experiences and lessons learned

|                               |                                                                                                                                                                                                                                                                                                                                                                                                                                                                                                                                                                                                                                                                                                                                                                                                                                                                                                                                                                                                                                                                                                                                                                                                           |
|-------------------------------|-----------------------------------------------------------------------------------------------------------------------------------------------------------------------------------------------------------------------------------------------------------------------------------------------------------------------------------------------------------------------------------------------------------------------------------------------------------------------------------------------------------------------------------------------------------------------------------------------------------------------------------------------------------------------------------------------------------------------------------------------------------------------------------------------------------------------------------------------------------------------------------------------------------------------------------------------------------------------------------------------------------------------------------------------------------------------------------------------------------------------------------------------------------------------------------------------------------|
| Journal:                      | <i>BMJ Open</i>                                                                                                                                                                                                                                                                                                                                                                                                                                                                                                                                                                                                                                                                                                                                                                                                                                                                                                                                                                                                                                                                                                                                                                                           |
| Manuscript ID                 | bmjopen-2021-048825                                                                                                                                                                                                                                                                                                                                                                                                                                                                                                                                                                                                                                                                                                                                                                                                                                                                                                                                                                                                                                                                                                                                                                                       |
| Article Type:                 | Original research                                                                                                                                                                                                                                                                                                                                                                                                                                                                                                                                                                                                                                                                                                                                                                                                                                                                                                                                                                                                                                                                                                                                                                                         |
| Date Submitted by the Author: | 07-Jan-2021                                                                                                                                                                                                                                                                                                                                                                                                                                                                                                                                                                                                                                                                                                                                                                                                                                                                                                                                                                                                                                                                                                                                                                                               |
| Complete List of Authors:     | Muwanguzi, Patience A. ; Makerere University, School of Health Sciences, College of Health Sciences<br>Kutyabami, Paul; Makerere University, School of Health Sciences, College of Health Sciences<br>Osingada, Charles Peter; Makerere University, School of Health Sciences, College of Health Sciences<br>Nasuuna, Esther M.; Makerere University, Infectious Diseases Institute, College of Health Sciences<br>Kitutua, Freddy; Makerere University, School of Health Sciences, College of Health Sciences<br>Ngabirano, Tom Denis; Makerere University, School of Health Sciences, College of Health Sciences<br>Nankumbi, Joyce; Makerere University, School of Health Sciences, College of Health Sciences<br>Muhindo, Richard; Makerere University, School of Health Sciences, College of Health Sciences<br>Kabiri, Lydia; Makerere University, School of Health Sciences, College of Health Sciences<br>Namutebi, Mariam; Makerere University, School of Health Sciences, College of Health Sciences<br>Nabunya, Racheal; Makerere University, School of Health Sciences, College of Health Sciences<br>Kiwankambo, Nelson; Makerere University, School of Medicine, College of Health Sciences |
| Keywords:                     | COVID-19, HIV & AIDS < INFECTIOUS DISEASES, QUALITATIVE RESEARCH                                                                                                                                                                                                                                                                                                                                                                                                                                                                                                                                                                                                                                                                                                                                                                                                                                                                                                                                                                                                                                                                                                                                          |
|                               |                                                                                                                                                                                                                                                                                                                                                                                                                                                                                                                                                                                                                                                                                                                                                                                                                                                                                                                                                                                                                                                                                                                                                                                                           |

SCHOLARONE™  
Manuscripts

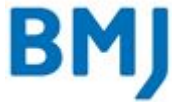

I, the Submitting Author has the right to grant and does grant on behalf of all authors of the Work (as defined in the below author licence), an exclusive licence and/or a non-exclusive licence for contributions from authors who are: i) UK Crown employees; ii) where BMJ has agreed a CC-BY licence shall apply, and/or iii) in accordance with the terms applicable for US Federal Government officers or employees acting as part of their official duties; on a worldwide, perpetual, irrevocable, royalty-free basis to BMJ Publishing Group Ltd ("BMJ") its licensees and where the relevant Journal is co-owned by BMJ to the co-owners of the Journal, to publish the Work in this journal and any other BMJ products and to exploit all rights, as set out in our [licence](#).

The Submitting Author accepts and understands that any supply made under these terms is made by BMJ to the Submitting Author unless you are acting as an employee on behalf of your employer or a postgraduate student of an affiliated institution which is paying any applicable article publishing charge ("APC") for Open Access articles. Where the Submitting Author wishes to make the Work available on an Open Access basis (and intends to pay the relevant APC), the terms of reuse of such Open Access shall be governed by a Creative Commons licence – details of these licences and which [Creative Commons](#) licence will apply to this Work are set out in our licence referred to above.

Other than as permitted in any relevant BMJ Author's Self Archiving Policies, I confirm this Work has not been accepted for publication elsewhere, is not being considered for publication elsewhere and does not duplicate material already published. I confirm all authors consent to publication of this Work and authorise the granting of this licence.

## Conducting an ongoing HIV clinical trial during the COVID-19 pandemic in Uganda: A qualitative study of research team and participants' experiences and lessons learned

Patience A. Muwanguzi<sup>1§</sup>, Paul Kutyabami<sup>1</sup>, Charles Peter Osiyingada<sup>1</sup>, Esther M. Nasuuna<sup>2</sup>, Freddy E. Kitutu<sup>1</sup>, Tom Denis Ngabirano<sup>1</sup>, Joyce Nankumbi<sup>1</sup>, Richard Muhindo<sup>1</sup>, Lydia Kabiri<sup>1</sup>, Mariam Namutebi<sup>1</sup>, Racheal Nabunya<sup>1</sup>, Noah Kiwanuka<sup>3</sup>, Nelson K. Sewankambo<sup>4</sup>

<sup>1</sup>School of Health Sciences, College of Health Sciences, Makerere University, Kampala, Uganda

<sup>2</sup>Infectious Diseases Institute, College of Health Sciences, Makerere University, Kampala, Uganda

<sup>3</sup>School of Public Health, College of Health Sciences, Makerere University, Kampala, Uganda

<sup>4</sup>School of Medicine, College of Health Sciences, Makerere University, Kampala, Uganda

§Corresponding author: Patience A. Muwanguzi  
P. O. Box 5259, Kampala, Uganda  
Phone number: +256392178085  
Email: [nursepesh@gmail.com](mailto:nursepesh@gmail.com)

Email addresses of authors:

PAM: [nursepesh@gmail.com](mailto:nursepesh@gmail.com)

PK: [paulkutyabami@gmail.com](mailto:paulkutyabami@gmail.com)

CPO: [chaposingada@gmail.com](mailto:chaposingada@gmail.com)

EMN: [enasuuna@gmail.com](mailto:enasuuna@gmail.com)

FEK: [kitutufred@gmail.com](mailto:kitutufred@gmail.com)

TDN: [tomngabirano@gmail.com](mailto:tomngabirano@gmail.com)

JN: [joynankumbi@gmail.com](mailto:joynankumbi@gmail.com)

RM: [r.muhindo@yahoo.com](mailto:r.muhindo@yahoo.com)

LK: [kabdia4@gmail.com](mailto:kabdia4@gmail.com)

MN: [mariamnamutebi@gmail.com](mailto:mariamnamutebi@gmail.com)

RN: [rakelkyabs@gmail.com](mailto:rakelkyabs@gmail.com)

NK: [nkiwanuka@gmail.com](mailto:nkiwanuka@gmail.com)

NKS: [sewankam@infocom.co.ug](mailto:sewankam@infocom.co.ug)

**Keywords:** COVID-19; HIV & AIDS; Qualitative research

## Abstract

**Objective:** To explore the experiences and lessons learned by the study team and participants of the WISE-Men (Workplace-based HIV self-testing among Men) trial during the COVID-19 pandemic in Uganda.

**Design:** An explorative qualitative study comprising two virtual focus group discussions with 12 participants and 32 in-depth interviews (N=44). Data were collected via telephone calls for in-depth interviews or Zoom® for focus group discussions and manually analyzed by inductive content analysis.

**Setting:** Fourteen private security companies in two Uganda districts.

**Participants:** Members of the clinical trial study team, and men working in private security companies who undertook workplace-based HIV testing.

**Results:** The key themes for participants experiences were: 'challenges in accessing HIV treatment and care', 'misinformation' and 'difficulty participating in research activities'. The effects on HIV treatment and care resulted from; repercussions of the COVID-19 restrictions, participants fear of co-infection and negative experiences at health facilities. The difficulty in participating in research activities arose from: fear of infection with COVID-19 for the participants who tested HIV negative, transport difficulties, limited post-test psychosocial support and lack of support to initiate Pre-exposure prophylaxis.

The key study team reflections focused on the management of the clinical trial, effects of the local regulations and government policies and the need to adhere to ethical principles of research.

**Conclusions:** Findings highlight the need to organize different forms of HIV support for persons living with HIV during a pandemic. Additionally, the national research regulators and ethics committees or review boards are strongly encouraged to develop policies and guidelines for the continuity of research and clinical trials in the event of future shocks. Furthermore, this study calls on the appropriate government agencies to ensure public and researchers' preparedness through continuing education and support.

## Strengths and limitations of this study

- This is the first study of the experiences and lessons learned while conducting an ongoing HIV clinical trial during the COVID-19 pandemic in Uganda.
- This study shares the perspectives of both the clinical trial team and trial participants.

- We utilized telephone calls for the in-depth interviews and the Zoom® platform for the focus group discussions.
- Telephone interviews made it impossible to observe non-verbal cues during the in-depth interviews.

## Introduction

Coronavirus Disease 2019 (COVID-19) is a viral respiratory disease caused by the 2019 novel coronavirus (SARS-CoV-2) <sup>1 2</sup>. By 07, January 2021, there were 85,509,194 confirmed cases of COVID-19 worldwide, reported to the World Health Organization (WHO) with 36,050 cases and 274 deaths in Uganda <sup>3</sup>. Several countries introduced variations of social distancing restrictions ranging from the extreme of lockdown, to banning of social gatherings and quarantine of exposed individuals. While these measures may have helped to disrupt the spread of the virus, they also interrupted the delivery of other health services and the conduct of research activities. Global reports on the impact of COVID-19 on health systems are beginning to emerge. For example, because of the closure of borders and lock downs, antiretroviral (ARV) manufacturers in India reported concerns with international shipping of raw materials, thus causing delays and raising costs <sup>4</sup>. Globally, there is an expected shortage of ARVs not only because of the lockdowns, but also due to a shift of financial resources <sup>5</sup>. Consequently, HIV morbidity and mortality are expected to increase during the pandemic and post-pandemic. A model by Jewell et al. <sup>6</sup>, predicts that a six-month supply disruption of ARVs because of COVID-19 pandemic could result in over 500,000 HIV related deaths in sub-Saharan Africa and 2-fold increase of mother to child transmission of HIV.

1  
2  
3 One of the challenges faced by the global community is how to maintain  
4 continuity of HIV care, treatment, and research programs during the COVID-  
5 19 pandemic. Emerging evidence suggests that COVID-19 has disrupted HIV  
6 services with negative implications on the attainment of the 90-90-90 targets  
7 and clinical services for people living with HIV/AIDS (PLWHA) <sup>7</sup>. In a survey  
8 conducted in February 2020 in China, 32.6% of PLWHA were at risk of  
9 antiretroviral therapy (ART) discontinuation and another 48.6% did not know  
10 where to get ARVs in the near future <sup>8</sup>. In yet another study, Sun et al. (2020)  
11 found that 22.8 % of the participants, reported medication uptake was  
12 disrupted and 67.5% worried about disruption in their medication and future  
13 care <sup>9</sup>. In the same study, some participants discontinued medication to keep  
14 their HIV status concealed <sup>9</sup>. Field notes from Kenya document how the  
15 disease has impacted HIV testing and assisted partner-notification programs  
16 <sup>10</sup>. Due to fear of acquiring the COVID-19 infection, patients hesitated to  
17 attend the clinic, and many others could not afford transport to the health  
18 facilities <sup>11</sup>.

19  
20  
21  
22  
23  
24  
25  
26  
27  
28  
29  
30  
31  
32  
33  
34  
35  
36  
37  
38  
39  
40  
41  
42 In this study, we sought to document experiences of clinical trial study  
43 participants and reflections of the study team in the Wise-Men trial during the  
44 COVID-19 pandemic. The 'WISe-Men' trial (**W**orkplace-based HIV **S**elf-testing  
45 among **M**en) is a cluster-randomized trial assessing the effectiveness of  
46 workplace-based HIV self-testing in Uganda (Clinicaltrials.gov, ID:  
47 NCT04164433). The trial started participant enrolment on February 4, 2020.  
48 However, new participant enrolments were halted on March 28, 2020. This  
49 followed directives such as the country-wide mandatory lockdown and curfew  
50  
51  
52  
53  
54  
55  
56  
57  
58  
59  
60

1  
2  
3 implemented by the Ugandan government and the national research  
4  
5 regulator, the Uganda National Council of Science and Technology (UNCST)  
6  
7  
8 12 13.  
9

## 10 11 12 **Methods**

### 13 14 15 **Study design and participants**

16  
17  
18 This was an explorative qualitative sub-study nested in a clinical trial. The data  
19  
20 in this study was collected during follow-up calls with trial participants. In this  
21  
22 paper, '*study participants*' will refer to the enrolled clinical trial participants  
23  
24 who consented to share the challenges reported in this paper. The trial  
25  
26 participants who took part in this study were men employed by private security  
27  
28 companies in two Ugandan districts: Hoima and Kampala. Participants were  
29  
30 eligible to share their perspectives if they were already enrolled in the WISE-  
31  
32 Men trial. The eligibility criteria were 1) Men 18-60 years old 2) Employed >6  
33  
34 months within the security industry 3) Not tested for HIV before 4) Negative test  
35  
36 results for HIV more than one year prior to enrolment.  
37  
38  
39  
40  
41  
42  
43

### 44 45 **Ethical considerations**

46  
47 This sub-study ethical approval was granted by the School of Health Sciences  
48  
49 Research and Ethics Committee at Makerere University (Ref. Number: 2018-  
50  
51 054). Additional approval was obtained from the UNCST (Ref Number: HS 2672).  
52  
53 The initial study design did not include telephone or Zoom interviews; therefore,  
54  
55 additional approval for these changes was obtained in August 2020. All  
56  
57 interactions with the participants were audio-recorded with permission.  
58  
59  
60



1  
2  
3 Patients or the public were not involved in the design, or conduct, or reporting,  
4  
5 or dissemination plans of our research.  
6  
7  
8

## 9 **Data Collection**

10  
11 Data were collected from a combination of in-depth interviews and virtual  
12  
13 Focus group discussions by PAM and two research assistants who are trained  
14  
15 and have experience in qualitative methodologies.  
16  
17  
18

### 19 ***In-depth participant interviews***

20  
21 Two research team members experienced in qualitative research conducted  
22  
23 the in-depth interviews (IDIs). Participants were purposefully sampled to  
24  
25 include men from different employee ranks and age categories (18-25, 36-35,  
26  
27 36-45 and 46-64). The interview guide was tested and developed iteratively at  
28  
29 three pilot interviews to refine the questions. The participants in the pilot  
30  
31 interviews gave consent prior to participation in the study. The interview guide  
32  
33 collected data about participants' experiences, challenges and lessons  
34  
35 learned while participating in all the trial activities during the COVID-19  
36  
37 pandemic. Phone interviews were conducted in August and September 2020  
38  
39 and each lasted 45 minutes to an hour.  
40  
41  
42  
43  
44  
45

### 46 ***Research team reflections***

47  
48 Reflections from the research team were collected during the daily de-brief  
49  
50 meetings. The reflections were collected in two ways; face-to-face in-depth  
51  
52 interviews (IDIs) between March 15, to March 30, 2020, and virtual focus group  
53  
54 discussions (FGDs) between June 1, to June 11, 2020 using the Zoom platform.  
55  
56 The FGDs had 6 team members per group. All the team members were  
57  
58  
59  
60

1  
2  
3 informed that these reflections were part of the study, and informed consent  
4 was sought. The meetings lasted 45 minutes to one hour, led by a moderator  
5 and note-taker. Both the FGD and IDI utilised an open guide with the question  
6  
7  
8 “*What were today’s experiences, successes, challenges and lessons learned*  
9  
10  
11 *from conducting the WISe-Men trial during the COVID-19 pandemic?*” This  
12  
13 question was incorporated into the clinical trial following ethics approval to  
14  
15 modify the design during the unanticipated COVID-19 pandemic.  
16  
17  
18  
19  
20

## 21 **Data Analysis**

22  
23  
24 The phone interview recordings were transcribed verbatim. The minutes from  
25  
26 each de-brief meeting were typed up after each meeting and archived. Both  
27  
28 the participant and study team data were analyzed manually using inductive  
29  
30 content analysis. This process entailed open coding, developing emergent  
31  
32 categories and conceptualization<sup>14</sup>. Two team members (PAM and RN)  
33  
34 reviewed the transcripts independently. The pair identified codes separately  
35  
36 and then discussed them to achieve consensus. Any disagreements on the  
37  
38 codes were settled by discussion with another member of the trial team (TDN).  
39  
40  
41 The coders iteratively named and re-named the codes as more insights and  
42  
43 latent meanings emerged from the data. The codes were then grouped into  
44  
45 categories and subcategories.  
46  
47  
48  
49

50  
51 The research team members who took part in the de-brief meetings did not  
52  
53 analyze the data.  
54  
55  
56  
57  
58  
59  
60

1  
2  
3 To ensure trustworthiness and the quality of the data, a sample of the study  
4 participants reviewed the categories and subcategories. Interview notes were  
5 recorded in the principal researcher's reflective journal for confirmability.  
6  
7  
8  
9

## 10 11 12 **Results**

### 13 14 15 **Participant's characteristics**

16  
17  
18 In total we interviewed 44 participants, the majority were 18-25 years old, and  
19 mostly security guards. See table 1.  
20  
21  
22

### 23 24 25 **Participants' challenges**

26  
27  
28 Three themes emerged from the participants' experiences. The themes,  
29 categories, and sub-categories are presented in Figure 1.  
30  
31  
32

### 33 34 35 **Challenges in accessing HIV treatment and care**

36  
37  
38 Participants reported challenges in seeking and accessing HIV treatment and  
39 care. The narrative quotes are presented in table 2.  
40  
41

### 42 43 44 **Difficulty accessing treatment facilities**

45  
46  
47 Several participants who had recently started on ART were unable to continue  
48 with their treatment due to difficulty in accessing the health facility following  
49 the stay-at-home directives among other reasons. During the COVID-19  
50 lockdown and curfew period in Uganda, only essential personnel who had  
51 special car stickers or travel in vehicles with special government permission  
52 were permitted to drive personal cars. Additionally, during this time, many  
53 worksites were closed. The study participants had previously selected health  
54  
55  
56  
57  
58  
59  
60

1  
2  
3 facilities that were close to their workplaces for their HIV care. They expressed  
4  
5 difficulty in walking to and from their homes to the health facility to access their  
6  
7 treatment.  
8  
9

### 10 11 ***Interruptions in HIV treatment schedule*** 12

13 A few participants experienced interruptions in their treatment schedule due  
14  
15 to issues of non-disclosure of their HIV status and inability to explain the daily  
16  
17 medication to their partner. They reported that they typically keep their  
18  
19 medications at the workplace where they can easily take them without  
20  
21 intrusive questioning from family members.  
22  
23  
24  
25

### 26 27 ***Fear of co-infection with COVID-19*** 28

29 Study participants who tested positive for HIV expressed concern about being  
30  
31 more at risk of COVID-19 infection because it was widely circulated that men,  
32  
33 older people, and those with pre-existing comorbidities were more susceptible  
34  
35 to infection.  
36  
37  
38

### 39 40 ***Difficulty in transferring HIV care to new facilities*** 41

42 During the lockdown period, some participants travelled to their home villages  
43  
44 to stay with their families. While they were there, they visited nearby hospitals  
45  
46 for drug refills, however, some were denied the opportunity to transfer their  
47  
48 care to new ART treatment facilities.  
49  
50

### 51 52 ***Limited HIV treatment support at health facilities*** 53

54 Some of the participants experienced some side effects following ART  
55  
56 initiation. One suffered from severe stomach upsets and skin changes which  
57  
58 he attributed to the ART treatment. Unfortunately, he was not able to access  
59  
60

1  
2  
3 the hospital where he was receiving HIV care. He felt unsupported and still  
4 reports difficulty coping with the new treatment.  
5  
6  
7

## 8 9 **Misinformation**

10  
11  
12 At the start of the pandemic, there was a lot of information shared via several  
13 social media platforms. Participants reported that this information influenced  
14 their decisions regarding HIV treatment. The narrative quotes are presented in  
15 table 2.  
16  
17  
18  
19  
20  
21  
22

### 23 ***Incorrect information about COVID-19***

24  
25 Some participants reported that they received wrong information from their  
26 peers. For example, some participants were informed that PLWHA who were  
27 on ART were more likely to get infected with COVID-19. Therefore, some  
28 participants stopped taking their medication.  
29  
30  
31  
32  
33  
34

### 35 ***Unforeseen effects of peer information on ART adherence***

36  
37  
38 A few participants heard about Remdesivir as a potential drug for use in  
39 treatment of COVID-19. Their colleagues suggested that it was like the HIV  
40 antiretroviral medication. This erroneously encouraged adherence to their ART  
41 regimen as they thought it would lower their risk of COVID-19 infection.  
42  
43  
44  
45  
46  
47  
48

### 49 **Difficulty participating in research activities**

50  
51  
52 The other main experience involved the participants' difficulty in taking part in  
53 follow-up research activities as part of the clinical trial. The narrative quotes are  
54 presented in table 2.  
55  
56  
57  
58  
59  
60

### ***Transport difficulties***

Following enrolment into the trial, each participant was meant to return for follow-up visits after 1 week, one month and then at three months. Unfortunately, the stay-at-home orders made this impossible. The research team then changed to follow-up phone calls; however, some participants had poor telephone network connectivity and therefore missed these calls.

### ***Fear of exposure to COVID-19***

Participants were concerned about the likelihood of exposure to the coronavirus at the research site. They requested for a significant risk allowance for in-person visits during the pandemic.

### ***Limited post-test psychosocial support***

Some participants tested HIV positive for the first time and were still in denial. They reported the unmet need of support with adherence, coping with taking ART, dealing with side effects, and assisted partner notification.

### ***Need for PrEP initiation support***

One of the participants who was undergoing counselling to commence PrEP, reported that he lacked the confidence to start without face-to-face support.

### **Study team reflections of managing a clinical trial during the COVID-19 pandemic**

The study team reflected on their experiences of conducting an ongoing clinical trial during the COVID-19 pandemic. The coding tree is in figure 2 and the categories and narrative quotes are presented in table 3.

### **Effects of local regulations and government policies**

1  
2  
3 On March 25, 2020, the government of Uganda suspended public transport  
4 and placed restrictions on private vehicle movements, while on March 30, the  
5  
6 President declared a nationwide lockdown and curfew <sup>12</sup>. On March 27, the  
7  
8 UNCSST banned the recruitment of new study participants. Researchers were  
9  
10 also directed to halt face-to-face follow-up visits of the already recruited  
11  
12 participants indefinitely <sup>13</sup>. This had ripple effects on both the management  
13  
14 and continuity of the clinical trial.  
15  
16  
17  
18  
19  
20

## 21 **Clinical trial management**

### 22 ***Trial design modifications***

23  
24  
25 This was a cluster randomized design where two districts were randomly  
26  
27 assigned to receive the intervention which was HIV self-testing and the  
28  
29 standard HIV testing services to the control arm. During this time, several trial  
30  
31 participants travelled back to their home villages or ancestral homes. The study  
32  
33 team expressed concern that this may have unintentionally caused  
34  
35 'contamination' among the individuals, since participants in both the control  
36  
37 and intervention clusters could have interacted in the villages. Evidence is still  
38  
39 being sought regarding whether there was study contamination.  
40  
41  
42  
43  
44  
45  
46  
47

### 48 ***Budget and procurement alterations***

49  
50 The trial started enrolment on 4, February 2020, and the first COVID-19 case in  
51  
52 Uganda was reported on 21, March 2020 <sup>12</sup>. The study team therefore incurred  
53  
54 unanticipated purchases and budget modifications to ensure continuity of  
55  
56 study activities, and safety of the team and participants.  
57  
58  
59  
60

### ***Supply chain interruptions***

A prominent implication of the COVID-19 pandemic was the degree to which services were entirely shut down. This meant that there were interruptions in procuring and obtaining equipment and materials needed for crucial elements of the clinical trial, which led to a delay in research activities.

### ***Human resource considerations***

The study team members reported low levels of COVID-19 health literacy. The trial directors hired more staff who had received training in infection prevention and control (IPC) measures for COVID-19. The new personnel conducted screening, 4 hourly surface disinfection and provided training and education for study participants. Other precautionary measures are highlighted in table 3. Additionally, the trial suffered some personnel losses since some team members were unable to continue participating in the research activities.

### ***Loss to follow-up (LTFU) of enrolled participants***

Some security companies downsized, and participants lost their jobs, therefore, they had to be removed from the trial as they no longer met the inclusion criteria. Others could not be reached due to their poor phone network connectivity, while others simply refused to take calls from the study team.

### ***Adherence to ethical principles of research***

#### ***Ethical approvals for protocol deviations***

The trial protocol and consent forms were modified to reflect the changes mentioned in table 3 and submitted to the review board for approval before the trial could proceed. The research team felt that the modifications were



1  
2  
3 minor and did not necessitate a complete discontinuation of the trial.  
4  
5 However, because of the COVID-19 restrictions, there was a substantial delay  
6  
7 before this was approved.  
8  
9

### 10 11 **Balancing risks and benefits** 12

13  
14 The study team conducted daily assessments of predictable risks to both the  
15  
16 staff and the trial participants in comparison with potential benefits. The trial  
17  
18 was eventually halted, and several contingency plans were initiated to ensure  
19  
20 safe continuity of some research activities.  
21  
22

### 23 24 25 **Discussion** 26

27  
28 This sub-study explored the trial team and participants' experiences of  
29  
30 participating in an ongoing clinical trial during a pandemic. Three themes  
31  
32 emerged for the participants' experiences: effects on accessing HIV treatment  
33  
34 and care, misinformation and difficulty participating in research activities. The  
35  
36 study team reflections focused on the management of the clinical trial, effects  
37  
38 of the local regulations and government policies and the need to adhere to  
39  
40 ethical principles of research.  
41  
42

43  
44 One of the greatest implications for this clinical trial were the knock-on effects  
45  
46 of the local regulations and government policies. In March 2020, the  
47  
48 government of Uganda enforced several COVID-19 restrictions including travel  
49  
50 bans, border closures, nationwide lockdowns and curfews, and suspension of  
51  
52 mass gatherings <sup>12</sup>. While this strategy maybe efficacious in preventing the  
53  
54 transmission of COVID-19, it could aggravate non-COVID-19 related health  
55  
56  
57  
58  
59  
60

1  
2  
3 outcomes<sup>15</sup>. Additionally, as in this study, these effects may include difficulties  
4  
5 in accessing lifesaving treatment, or participating in research activities.  
6  
7 Furthermore, results from mathematical modelling suggest that interruption to  
8  
9 condom supply and health education could make populations more  
10  
11 vulnerable to increases in HIV incidence.<sup>16</sup> In agreement with<sup>17</sup>, this suggests  
12  
13 the need for appropriate government agencies and research regulatory  
14  
15 bodies to develop systems that can ensure continuity of essential services and  
16  
17 research even when lockdowns and travel bans are in effect. Research and  
18  
19 ethics committees might consider asking researchers conducting trials in HIV,  
20  
21 to submit a contingency plan if participants are unable to access their  
22  
23 treatment and care.  
24  
25  
26  
27  
28  
29

30  
31 An important consideration is the need to plan for different forms of support for  
32  
33 research participants and PLWHA during a pandemic. The difficulty in  
34  
35 continuing ART treatment was a recurring issue among many of the  
36  
37 participants who missed clinic visits. This agrees with Opio and colleagues in  
38  
39 Uganda who reported some of the major reasons for loss to follow up (LTFU) as  
40  
41 the long distance from home to the health facility for drug replenishment and  
42  
43 limited capacity at lower level ART clinics<sup>18</sup>. In hindsight, HIV research teams  
44  
45 could have provided participants with transfer letters to new facilities or home  
46  
47 delivery of ART<sup>19</sup>. For example, the research team from a Tuberculosis clinical  
48  
49 trial made arrangements for delivery of medicines to the homes of participants  
50  
51 who gave prior consent<sup>20</sup>. Another form of support could be psychosocial  
52  
53 support where participants are availed a phone number that they can  
54  
55  
56  
57  
58  
59  
60

1  
2  
3 contact for any further pertinent discussions or a routine follow-up phone call  
4  
5 in the absence of in-person visits. At the policy level, Rewari and colleagues  
6  
7 recommend instituting measures and guidelines to minimize ART supply shocks  
8  
9 and to prepare for future emergencies <sup>4</sup>.  
10  
11  
12  
13

14 Another challenge that the research participants faced was the  
15  
16 misinformation regarding COVID-19. Some participants halted their treatment  
17  
18 because of misinformation from their peers about the relationship between  
19  
20 ART and infection with COVID-19. Coincidentally, the information from peers  
21  
22 encouraged adherence to ART. This followed reports that patients with both  
23  
24 HIV and SARS-CoV-2 co-infected patients may have a less severe clinical  
25  
26 picture of COVID-19 if they are already receiving ART <sup>21</sup>. Unfortunately, they  
27  
28 altered the information that people on ART were less likely to get the COVID-  
29  
30 19 infection. To prevent this, researchers should make every effort to get well  
31  
32 informed about a new health threat (within the limits of available information),  
33  
34 so that they can advise participants appropriately but also make robust plans  
35  
36 on how to manage the research. Researchers are therefore encouraged to  
37  
38 design information and initiatives to advance research literacy and serve as a  
39  
40 source for correct information. This will maintain trust and encourage  
41  
42 continued participation and engagement <sup>22-24</sup> and prevent unnecessary fear  
43  
44 and distress <sup>25</sup>. Participants should receive regular practical tips on handling  
45  
46 the disruption in their work life and giving them hope that normal research  
47  
48 activities will resume once the pandemic abates <sup>26-28</sup>.  
49  
50  
51  
52  
53  
54  
55  
56  
57  
58  
59  
60

1  
2  
3 The principle of beneficence requires those in positions of responsibility to act  
4 with the best intentions for all those under their jurisdiction <sup>29</sup>, therefore trial  
5 managers must be cognizant of maintaining the integrity of the trial whilst  
6 ensuring the safety of the participants <sup>30</sup>. The COVID-19 pandemic poses  
7 potential serious risks for clinical trial participants and staff engaged in health  
8 research. Researchers should ensure that participant safety is always supreme  
9  
10  
11  
12  
13  
14  
15  
16  
17  
18  
19  
20  
21  
22  
23  
24  
25  
26  
27  
28  
29  
30  
31  
32  
33  
34  
35  
36  
37  
38  
39  
40  
41  
42  
43  
44  
45  
46  
47  
48  
49  
50  
51  
52  
53  
54  
55  
56  
57  
58  
59  
60

29. For instance researchers may close a clinical trial where the risk of exposure to coronavirus is high <sup>20</sup>. Anker and colleagues discourage the hasty permanent termination of ongoing clinical trials unless they are nearing planned completion or have not yet started <sup>30</sup>. In this case, we initially stopped all procedures that prevented the social distancing requirements such as venepuncture. Eventually, we halted participant recruitment and face-to-face follow up visits.

Before the pandemic, many researchers only used in-person methods for follow up-visits. This period has seen clinical researchers consider several other options including the use of mobile apps, and other remote platforms to conduct research visits <sup>26</sup>. In this study, we used both Zoom and phone interviews to collect the follow-up data for the clinical trial. The telephone interviews drastically improved the time efficiency for following up participants, reduced the expenditure for participants' transport compensation, and provided access to participants who were geographically distant or located in high COVID-19 transmission areas. This agrees with <sup>31</sup> that telephones give researchers access to diverse resources and experiences without the

1  
2  
3 inconvenience, the expense and the time expended in travel. However, the  
4  
5 phone follow-up was a challenge for some participants who developed  
6  
7 reactions to the HIV medication and those who needed support with initiating  
8  
9 PrEP. Additionally, several ethical issues and unscrupulous behaviors may also  
10  
11 arise from the use of these new methods like Zoom such as potential abuse  
12  
13 and exploitation <sup>32</sup><sup>33</sup>. Potential difficulties such as lack of technology expertise,  
14  
15 confidentiality challenges, reimbursement matters <sup>34</sup>, poor phone network,  
16  
17 and low internet connectivity need to be addressed first.  
18  
19  
20  
21  
22  
23

## 24 **Conclusions and policy implications**

25  
26 The major implications for participants were the challenges in accessing HIV  
27  
28 treatment and care, misinformation, and difficulty in participating in research  
29  
30 activities. The major effects on the trial from the research team perspectives,  
31  
32 were the cumulative effects of local regulations, the unforeseen protocol  
33  
34 modifications, and the ethics committee reporting requirements. Responsible  
35  
36 government agencies and research regulators are strongly encouraged to  
37  
38 develop policies and guidelines in preparedness for the continuity of research  
39  
40 and clinical trials in the event of future pandemics or epidemics.  
41  
42  
43  
44  
45  
46  
47  
48  
49

## 50 **Competing interests**

51  
52 The authors declare that they have no competing interests.  
53  
54

## 55 **Data availability statement**

56  
57 Data will be made available upon reasonable request.  
58  
59  
60

## Authors' contributions

**PAM, RN, TDN** made substantial contributions to the conception of the manuscript, analyzed the data and drafted the paper. **PAM, RN, NK, NKS** are investigators on the WISe-Men trial. **PK, EMN, JN, RM, FEK, CPO, LK, MN, NK, NKS** critically revised the manuscript for important intellectual content. All the authors gave final approval of the work to be published. All authors agree to be accountable for all aspects of the work in ensuring that questions related to the accuracy or integrity of any part of the work are appropriately investigated and resolved.

## Acknowledgements

This project was made possible by a NURTURE fellowship award funded under training Grant Number D43TW010132 (PI: Nelson K. Sewankambo) from the Fogarty International Center of the National Institutes of Health. The funders had no role in study design, data collection and analysis, decision to publish, or preparation of the manuscript. The contents are solely the responsibility of the authors and do not necessarily represent the official views of the supporting institutions.

## List of abbreviations

|          |                          |
|----------|--------------------------|
| ART      | Antiretroviral Therapy   |
| ARV      | Antiretroviral           |
| CRT      | Cluster Randomised Trial |
| COVID-19 | Corona virus disease     |
| FGD      | Focus group discussion   |

|    |        |                                                    |
|----|--------|----------------------------------------------------|
| 1  |        |                                                    |
| 2  |        |                                                    |
| 3  | HIVST  | HIV Self-testing                                   |
| 4  |        |                                                    |
| 5  | HTS    | HIV Testing Services                               |
| 6  |        |                                                    |
| 7  |        |                                                    |
| 8  | IDI    | In-depth interview                                 |
| 9  |        |                                                    |
| 10 | IPC    | Infection prevention and control                   |
| 11 |        |                                                    |
| 12 |        |                                                    |
| 13 | LTFU   | Loss to follow-up                                  |
| 14 |        |                                                    |
| 15 | MoH    | Ministry of Health                                 |
| 16 |        |                                                    |
| 17 |        |                                                    |
| 18 | PI     | Principal Investigator                             |
| 19 |        |                                                    |
| 20 | PLWHA  | people living with HIV/AIDS                        |
| 21 |        |                                                    |
| 22 |        |                                                    |
| 23 | PPE    | Personal protective equipment                      |
| 24 |        |                                                    |
| 25 | PrEP   | Pre-exposure prophylaxis                           |
| 26 |        |                                                    |
| 27 |        |                                                    |
| 28 | SOPs   | Standard operating procedures                      |
| 29 |        |                                                    |
| 30 | UNAIDS | Joint United Nations Programme on HIV/AIDS         |
| 31 |        |                                                    |
| 32 |        |                                                    |
| 33 | UNCST  | Uganda National Council for Science and Technology |
| 34 |        |                                                    |
| 35 | WHO    | World Health Organisation                          |
| 36 |        |                                                    |

## References

1. Gorbalenya AE, Baker SC, Baric RS, et al. Severe acute respiratory syndrome-related coronavirus: The species and its viruses—a statement of the Coronavirus Study Group. *bioRxiv* 2020. DOI 2020;10(2020.02):07.937862.
2. Coronaviridae Study Group of the International Committee on Taxonomy of V. The species Severe acute respiratory syndrome-related coronavirus: classifying 2019-nCoV and naming it SARS-CoV-2. *Nat Microbiol* 2020;5(4):536-44. doi: 10.1038/s41564-020-0695-z [published Online First: 03/02]
3. WHO. WHO Coronavirus Disease (COVID-19) Dashboard 2020 [Available from: <https://covid19.who.int/> accessed June 13, 2020.
4. Rewari BB, Mangadan-Konath N, Sharma M. Impact of COVID-19 on the global supply chain of antiretroviral drugs: a rapid survey of Indian manufacturers. *WHO South East Asia J Public Health* 2020;9(2):126-33. doi: 10.4103/2224-3151.294306 [published Online First: 2020/09/27]
5. Oladele TT, Olakunde BO, Oladele EA, et al. The impact of COVID-19 on HIV financing in Nigeria: a call for proactive measures. *BMJ global health* 2020;5(5) doi: 10.1136/bmjgh-2020-002718 [published Online First: 2020/05/22]



- 1  
2  
3 6. Jewell BL, Mudimu E, Stover J, et al. Potential effects of disruption to HIV  
4 programmes in sub-Saharan Africa caused by COVID-19: results from multiple  
5 mathematical models. *The Lancet HIV* 2020
- 6  
7 7. Jiang H, Zhou Y, Tang W. Maintaining HIV care during the COVID-19 pandemic.  
8 *The lancet HIV* 2020;7(5):e308-e09. doi: 10.1016/s2352-3018(20)30105-3  
9 [published Online First: 2020/04/10]
- 10  
11 8. Guo W, Weng HL, Bai H, et al. [Quick community survey on the impact of COVID-  
12 19 outbreak for the healthcare of people living with HIV]. *Zhonghua Liu Xing*  
13 *Bing Xue Za Zhi* 2020;41(5):662-66. doi: 10.3760/cma.j.cn112338-20200314-  
14 00345 [published Online First: 2020/04/01]
- 15  
16 9. Sun S, Hou J, Chen Y, et al. Challenges to HIV Care and Psychological Health  
17 During the COVID-19 Pandemic Among People Living with HIV in China. *AIDS*  
18 *and behavior* 2020:1-2. doi: 10.1007/s10461-020-02903-4 [published Online First:  
19 2020/05/10]
- 20  
21 10. Lagat H, Sharma M, Kariithi E, et al. Impact of the COVID-19 Pandemic on HIV  
22 Testing and Assisted Partner Notification Services, Western Kenya. *AIDS and*  
23 *behavior* 2020:1-4. doi: 10.1007/s10461-020-02938-7 [published Online First:  
24 2020/06/04]
- 25  
26 11. Linnemayr S, Jennings Mayo-Wilson L, Saya U, et al. HIV Care Experiences During  
27 the COVID-19 Pandemic: Mixed-Methods Telephone Interviews with Clinic-  
28 Enrolled HIV-Infected Adults in Uganda. *AIDS Behav* 2020 doi: 10.1007/s10461-  
29 020-03032-8
- 30  
31 12. GOU. COVID-19 Response info hub-Timeline 2020 [Available from:  
32 <https://covid19.gou.go.ug/timeline.html> accessed 06/11/2020 2020.
- 33  
34 13. UNCST. New research registration procedures 20202 [Available from:  
35 <https://www.uncst.go.ug/new-research-registration-procedures/> accessed  
36 June 13, 2020.
- 37  
38 14. Elo S, Kyngäs H. The qualitative content analysis process. *Journal of advanced*  
39 *nursing* 2008;62(1):107-15.
- 40  
41 15. Mhango M, Chitungo I, Dzinamarira T. COVID-19 Lockdowns: Impact on Facility-  
42 Based HIV Testing and the Case for the Scaling Up of Home-Based Testing  
43 Services in Sub-Saharan Africa. *AIDS and behavior* 2020:1.
- 44  
45 16. Jewell BL, Mudimu E, Stover J, et al. Potential effects of disruption to HIV  
46 programmes in sub-Saharan Africa caused by COVID-19: results from multiple  
47 mathematical models. *The Lancet HIV* 2020;7(9):e629-e40.
- 48  
49 17. Pierre G, Uwizeza A, Dzinamarira T. Attendance to HIV antiretroviral collection  
50 clinic appointments during COVID-19 lockdown. A Single Center Study in  
51 Kigali, Rwanda. *AIDS and behavior* 2020:1-3.
- 52  
53 18. Opio D, Semitala FC, Kakeeto A, et al. Loss to follow-up and associated factors  
54 among adult people living with HIV at public health facilities in Wakiso district,  
55 Uganda: a retrospective cohort study. *BMC Health Services Research*  
56 2019;19(1):628. doi: 10.1186/s12913-019-4474-6
- 57  
58 19. Rebeiro PF, Duda SN, Wools-Kaloustian KK, et al. Implications of COVID-19 for HIV  
59 Research: data sources, indicators and longitudinal analyses. *Journal of the*  
60 *International AIDS Society* 2020;23(10):e25627. doi: 10.1002/jia2.25627
20. Rusen ID. Challenges in Tuberculosis Clinical Trials in the Face of the COVID-19  
Pandemic: A Sponsor's Perspective. *Trop Med Infect Dis* 2020;5(2) doi:  
10.3390/tropicalmed5020086 [published Online First: 2020/05/31]
21. Patel RH, Pella PM. COVID-19 in a patient with HIV infection. *Journal of Medical*  
*Virology* 2020



- 1
  - 2
  - 3
  - 4
  - 5
  - 6
  - 7
  - 8
  - 9
  - 10
  - 11
  - 12
  - 13
  - 14
  - 15
  - 16
  - 17
  - 18
  - 19
  - 20
  - 21
  - 22
  - 23
  - 24
  - 25
  - 26
  - 27
  - 28
  - 29
  - 30
  - 31
  - 32
  - 33
  - 34
  - 35
  - 36
  - 37
  - 38
  - 39
  - 40
  - 41
  - 42
  - 43
  - 44
  - 45
  - 46
  - 47
  - 48
  - 49
  - 50
  - 51
  - 52
  - 53
  - 54
  - 55
  - 56
  - 57
  - 58
  - 59
  - 60
22. Gobat N, Butler CC, Mollison J, et al. What the public think about participation in medical research during an influenza pandemic: an international cross-sectional survey. *Public Health* 2019;177:80-94. doi: 10.1016/j.puhe.2019.07.005 [published Online First: 2019/09/27]
23. Sentell T, Vamos S, Okan O. Interdisciplinary Perspectives on Health Literacy Research Around the World: More Important Than Ever in a Time of COVID-19. *Int J Environ Res Public Health* 2020;17(9) doi: 10.3390/ijerph17093010 [published Online First: 2020/05/03]
24. Bikson M, Hanlon CA, Woods AJ, et al. Guidelines for TMS/tES clinical services and research through the COVID-19 pandemic. *Brain Stimul* 2020;13(4):1124-49. doi: 10.1016/j.brs.2020.05.010 [published Online First: 2020/05/16]
25. Shah SGS, Farrow A. A commentary on "World Health Organization declares global emergency: A review of the 2019 novel Coronavirus (COVID-19)". *Int J Surg* 2020;76:128-29. doi: 10.1016/j.ijsu.2020.03.001 [published Online First: 2020/03/15]
26. Padala PR, Jendro AM, Padala KP. Conducting Clinical Research During the COVID-19 Pandemic: Investigator and Participant Perspectives. *JMIR Public Health Surveill* 2020;6(2):e18887. doi: 10.2196/18887 [published Online First: 2020/04/07]
27. Dunlop A, Lokuge B, Masters D, et al. Challenges in maintaining treatment services for people who use drugs during the COVID-19 pandemic. *Harm Reduct J* 2020;17(1):26. doi: 10.1186/s12954-020-00370-7 [published Online First: 2020/05/08]
28. Osseni IA. COVID-19 pandemic in sub-Saharan Africa: preparedness, response, and hidden potentials. *Tropical Medicine and Health* 2020;48(1):48. doi: 10.1186/s41182-020-00240-9
29. Hlongwa P. Current ethical issues in HIV/AIDS research and HIV/AIDS care. *Oral Dis* 2016;22 Suppl 1:61-5. doi: 10.1111/odi.12391 [published Online First: 2016/04/26]
30. Anker SD, Butler J, Khan MS, et al. Conducting clinical trials in heart failure during (and after) the COVID-19 pandemic: an Expert Consensus Position Paper from the Heart Failure Association (HFA) of the European Society of Cardiology (ESC). *Eur Heart J* 2020;41(22):2109-17. doi: 10.1093/eurheartj/ehaa461 [published Online First: 2020/06/05]
31. Block ES, Erskine L. Interviewing by telephone: Specific considerations, opportunities, and challenges. *International journal of qualitative methods* 2012;11(4):428-45.
32. Bashshur R, Doarn CR, Frenk JM, et al. Telemedicine and the COVID-19 Pandemic, Lessons for the Future. *Telemed J E Health* 2020;26(5):571-73. doi: 10.1089/tmj.2020.29040.rb [published Online First: 2020/04/11]
33. Hau YS, Kim JK, Hur J, et al. How about actively using telemedicine during the COVID-19 pandemic? *J Med Syst* 2020;44(6):108. doi: 10.1007/s10916-020-01580-z [published Online First: 2020/05/01]
34. Wright JH, Caudill R. Remote Treatment Delivery in Response to the COVID-19 Pandemic. *Psychother Psychosom* 2020;89(3):130-32. doi: 10.1159/000507376 [published Online First: 2020/03/28]

**Table 1. Demographics of Participants**

| <b>Participant Characteristics (N = 44)</b> | <b>Frequency<br/>(n)</b> | <b>Percentage<br/>(%)</b> |
|---------------------------------------------|--------------------------|---------------------------|
| <b>Age range, years</b>                     |                          |                           |
| 18-25                                       | 19                       | 43.2                      |
| 26-35                                       | 10                       | 22.7                      |
| 36-45                                       | 11                       | 25.0                      |
| 46-64                                       | 4                        | 9.1                       |
| <b>Employment position/ Job title</b>       |                          |                           |
| Security guard                              | 20                       | 45.5                      |
| Field supervisor/administrator              | 7                        | 15.9                      |
| Employers/ company executives               | 5                        | 11.4                      |
| Clinical trial team member                  | 12                       | 27.3                      |

**Table 2: Narrative quotes of participants' experiences in being part of an ongoing HIV trial during a pandemic**

| Sub-Category                                                   | Narrative quotes                                                                                                                                                                                                                                                                                                                                                                                                                                                                                                                             |
|----------------------------------------------------------------|----------------------------------------------------------------------------------------------------------------------------------------------------------------------------------------------------------------------------------------------------------------------------------------------------------------------------------------------------------------------------------------------------------------------------------------------------------------------------------------------------------------------------------------------|
| <b>Difficulty accessing treatment facilities</b>               | <i>"I got my results on March 2, 2020 and started taking HIV medication and was told to return for follow-up on April 6, 2020. I selected that hospital because it is close to my workplace but since we are not working now, I am at home and it is too far from the hospital. I have therefore decided to wait until we are released from this lockdown, to go for the medication."</i> (Participant 29, district 2)                                                                                                                       |
| <b>Interruptions in HIV treatment schedule</b>                 | <i>"I haven't yet told my wife my HIV status because I wasn't expecting to be tested positive. I have been keeping the ARVs at the office and taking them each morning as soon as I report to work. When companies were closed after the president's speech, I was one of those who was sent on temporary and indefinite unpaid leave. I am now at home and have no way of explaining why I am taking this daily medication. I just threw the tablets away and when I resume my work, I will start afresh."</i> (Participant 01, district 1) |
| <b>Fear of co-infection with COVID-19</b>                      | <i>"People have been saying that men and people who have other illnesses are more likely to get infected with COVID-19. Now that I am HIV positive, am I not more likely to get infected? Is HIV considered a pre-existing condition? Are people taking anti-retroviral treatment (ART) more at risk or is it better to continue the treatment?"</i> (Participant 05, district 2)                                                                                                                                                            |
| <b>Incorrect information about COVID-19 and HIV</b>            | <i>"Some of our colleagues told us that people who were on ART would get COVID-19 much faster than those who were HIV positive but not on ART. That all one needs to do is eat plenty of fruits and vegetables during this time. When this happened, I stopped taking the medicine for one week. With this lockdown, we are mostly getting information from our friends, it is very unfortunate that many of us stopped taking medicine based on fake information."</i> (Participant 07, district 1)                                         |
| <b>Unforeseen effects of peer information on ART adherence</b> | <i>"About a month ago, I was talking to some friends and they told me that there was a new drug for COVID-19. Apparently, this anti-viral drug is like the drugs we take for HIV. Although I did not tell them that I have HIV, I decided to take my drugs faithfully. I hope that this will lower my chance of getting the disease."</i> (Participant 7, district 1)                                                                                                                                                                        |
| <b>Difficulty in transferring HIV</b>                          | <i>"The lockdown from the government came so suddenly and we rushed to the village. I visited the health centre near my home for condoms and to refill my medicine [ART] for the next month, I was surprised to learn</i>                                                                                                                                                                                                                                                                                                                    |

1  
2  
3 **care to new**  
4 **facilities**

that I cannot just get medication from any hospital. They told me to go back to the place where I usually get my medication. I am now trying to get in touch with the former hospital to see if they can inform this health centre to allow me to pick some drugs." (Participant 16, district 2)

7 **Limited HIV**  
8 **treatment support**  
9 **at health facilities**

"I keep forgetting to take the tablets because I am not used to taking medicine every day. I have also been struggling with some pain in my stomach since I started taking the medications. There are also some changes in my skin, I developed some swellings on my arms, and I needed to show them to my counsellor, but I cannot access the hospital. She asked me to take some pictures and send them to her on the phone, but I do not have a smartphone. I can't cope with this anymore, I need support." (Participant 20, district 1)

14 **Transport**  
15 **difficulties**

"I was told to return for my follow-up visit on March 28, unfortunately by then we were in a lockdown so I couldn't go to the facility because of the stay-at-home order. About a week later, I was not feeling well and decided to go to the facility to see the counsellor. I started walking from my house at 7:00am and finally got to the hospital at about 11am. After seeing the doctor, it was 2pm and I could not get transport back home. Unfortunately, if I decided to walk, I would have reached home past curfew hours. I therefore decided to stay at the hospital for the night with no beddings since I had not prepared for an overnight visit. The next morning, I walked home again and by the time I got home, I was feeling unwell again and sore all over. After that experience, there was no way I could go to the hospital again." (Participant 1, District 2)

24 **Fear of infection**  
25 **with COVID-19**

"I am sorry that I did not come for the follow up visit, but I am worried about the danger of leaving my house. My family and I have been at home the entire month and my wife said that if I come back home then I need to self-isolate for 14 days. If I take that risk and come, then you must provide a substantial allowance for putting myself and my family at risk. I also figured that since I am HIV negative, there is really no need for me to come for any further check-up." (Participant 20, district 1)

31 **Limited post-test**  
32 **psychosocial**  
33 **support**

"Just a few weeks ago, I took a test, and I was told that I am HIV positive. I still cannot believe it. The counsellor told me that I need to start on treatment [ART] immediately but I still do not believe it. I had started talking with the counsellor who asked us to come back after one month and I have started accepting my fate. However, now that I cannot see her, I feel like I have gone back to a bad state, like how I was when I had just received my results. She calls me regularly, but the network is so poor and it is impossible to talk about so many things because we stay in a small place with many people now that we are all in the lock-down. I am waiting for this

1  
2  
3 to end then I go back to the hospital for further confirmation. I hope the person who did the first test made a  
4 mistake." (Participant 15, district 2)  
5

6 **Need for PrEP**  
7 **initiation support**

8 "My results were negative, but we discussed with the counsellor about starting treatment because of some  
9 reasons [PrEP]. I went to the hospital and I received the HIV drugs, but I have not yet started taking them.  
10 People told me that there are many side effects, and I do not want to have problems when I am on my own at  
11 home. I think I will wait to start treatment until I can easily see the counsellor or the doctor when they open  
12 public transport again." (Participant 5, District 1)  
13

---

14  
15  
16  
17  
18  
19  
20  
21  
22  
23  
24  
25  
26  
27  
28  
29  
30  
31  
32  
33  
34  
35  
36  
37  
38  
39  
40  
41  
42  
43  
44  
45  
46

For peer review only

**Table 3: Narrative quotes of the study team reflections on conducting a clinical trial during a pandemic**

| Category                                  | Narrative quotes                                                                                                                                                                                                                                                                                                                                                                                                                                                                                                                                                                     |
|-------------------------------------------|--------------------------------------------------------------------------------------------------------------------------------------------------------------------------------------------------------------------------------------------------------------------------------------------------------------------------------------------------------------------------------------------------------------------------------------------------------------------------------------------------------------------------------------------------------------------------------------|
| <b>Trial design modifications</b>         | <i>"During this time, several participants travelled back to their villages and homes, which may have reduced the ability to control for 'contamination' among the individuals and this could affect our study outcomes. Additionally, the original plan was for in-person follow up visits, but the travel restrictions made this almost impossible. According to the protocol, participants were supposed to receive group pre-test HIV counselling, however, was modified to individual counselling to accommodate the social distancing directives." (Study team member, 01)</i> |
| <b>Budget and procurement alterations</b> | <i>"For example, we had to procure personal protective equipment (PPE) like masks, aprons and gloves, and educational materials for the prevention of COVID-19. We also procured hand-held infrared temperature monitors, hand sanitizers, and installed handwashing stations for use at each entry point." (Study team member, 07)</i><br><i>...public transport, we increased the budgeted transport refund from 10,000 Uganda Shillings (USD 2.65) to 76,000 (USD 20) per participant to cater for private transportation." (Study team member, 11)</i>                           |
| <b>Supply chain disruptions</b>           | <i>"Predictably, some of the companies supplying materials for the trial closed and the few that were open were overwhelmed with numbers and resorted to rationing of supplies like PPE. We experienced disruptions in obtaining vital materials like HIVST test kits and were thus were unable to continue with crucial elements of our research." (Study team member, 01)</i>                                                                                                                                                                                                      |
| <b>Human resource considerations</b>      | <i>"...they hired two (2) new COVID-19 personnel responsible for sanitation, screening and for ensuring adherence to recommended infection prevention and control (IPC) guidelines. The new staff hired also trained the rest of us and helped to respond to any queries from the participants regarding COVID-19 as it continually evolved." (Study team member, 08)</i>                                                                                                                                                                                                            |
|                                           | <i>"The principal investigator made it clear that continuation of field-work was voluntary, and many people opted to work from home. This staffing reduction drastically slowed the trial processes because those of us who stayed had to handle more than one role." (Study team member, 06)</i>                                                                                                                                                                                                                                                                                    |

1  
2  
3  
4  
5  
6  
7  
8  
9  
10  
11  
12  
13  
14  
15  
16  
17  
18  
19  
20  
21  
22  
23  
24  
25  
26  
27  
28  
29  
30  
31  
32  
33  
34  
35  
36  
37  
38  
39  
40  
41  
42  
43  
44  
45  
46

**Effects of local regulations**

*"..the Principal investigator (PI) in consultation with the oversight committee and research team, halted the recruitment of new participants into the study. We also revised and prioritized trial outcome measures to collect at each follow-up visit and the participants who were already enrolled were followed up via phone."  
(Study team member, 02)*

**Loss to follow-up of enrolled participants**

*"Some of the men lost their jobs during this time and according to the trial eligibility criteria, had to be removed from the study. Others travelled upcountry to rural areas and their phones were unreachable due to the telecom network challenges. Others simply refused to take my calls or just kept 'rejecting' the call. This made participant follow-up difficult." (Study team member, 03)*

**Ethical approvals for protocol deviations**

*"The trial involved the collection of biological specimens (blood), therefore, each participant was required to don a face mask and wash their hands prior to involvement in any research activities. This was eventually halted as venepuncture invalidated the social distancing guidelines." (Study team member, 11)*

**Balancing risks and benefits**

*"Initially, the men were supposed to return for follow-up after 1 and 3 months. However, for those who were already recruited, their follow up visits were right in the middle of the lockdown. We therefore submitted a request for an amendment to the ethics committee to allow us to conduct the follow up visits by phone. Some of the participants were not happy about this because they wanted to discuss some things when they were assured of privacy" (Study team member, 09)*

*"We considered the aims of the study vs. the potential for exposure to COVID-19 for everyone involved, the potential for community transmission in the study districts and the staffing strain. We eventually temporarily halted the trial. However, before the temporary closure of the trial, we informed all the study participants and sought informed consent to conduct follow-up via phone calls. We also assigned study counsellors to individual study participants, to offer psychological support and for immediate contact in the event of any adverse events." (Study team member, 02)*

---



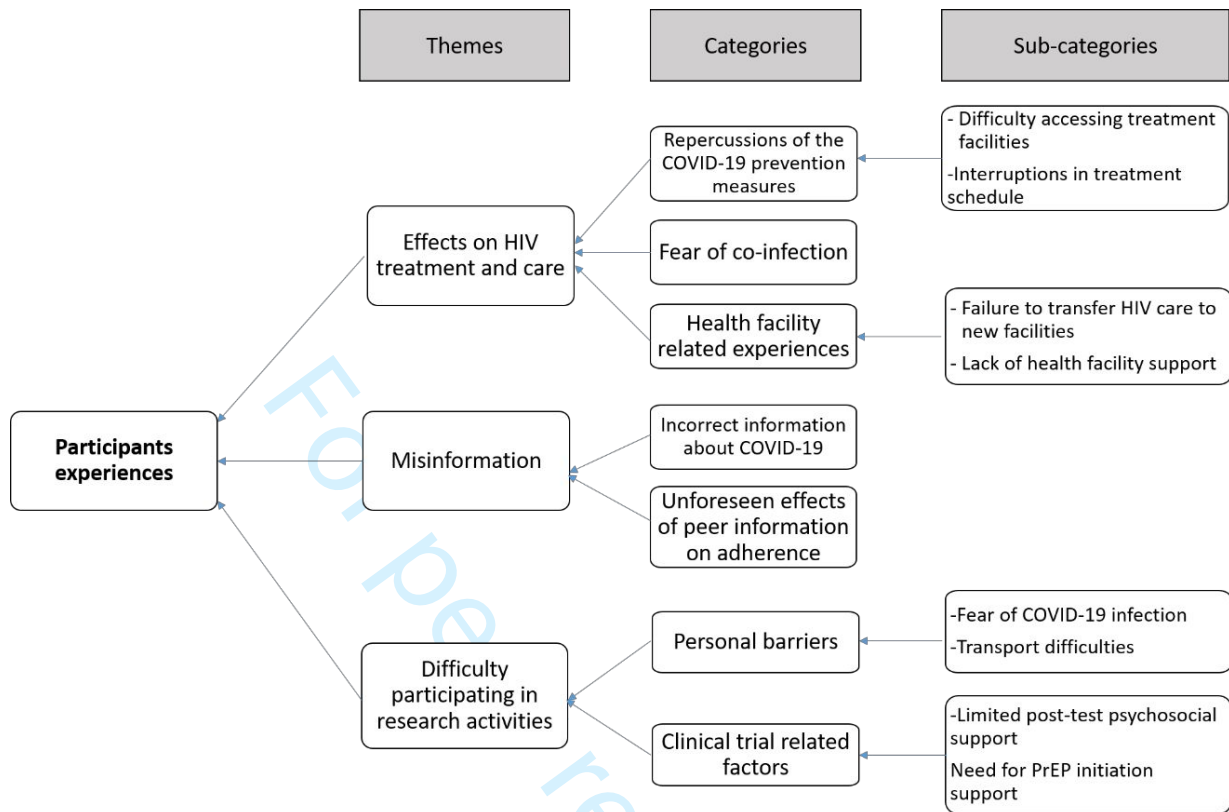

**Figure 1:** Coding tree for the participants experiences of participating in an ongoing HIV clinical trail during a pandemic



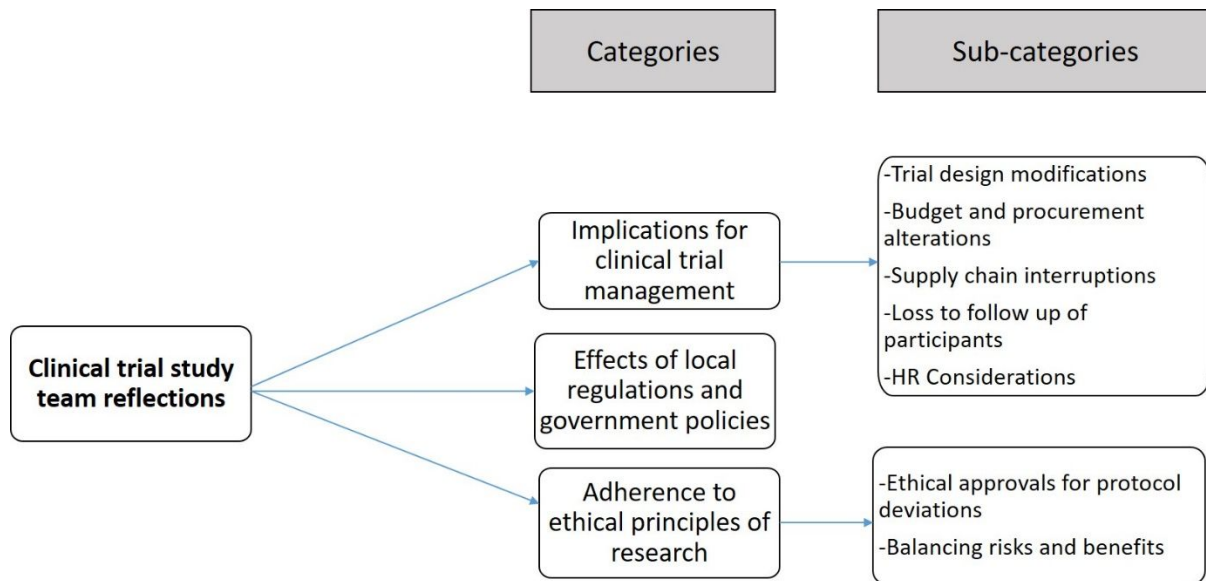

**Figure 2:** Coding tree for the clinical trial study team of managing an ongoing HIV clinical trail during a pandemic

## Standards for Reporting Qualitative Research (SRQR)

O'Brien B.C., Harris, I.B., Beckman, T.J., Reed, D.A., & Cook, D.A. (2014). Standards for reporting qualitative research: a synthesis of recommendations. *Academic Medicine*, 89(9), 1245-1251.

| No. | Topic                                       | Item                                                                                                                                                                                                                                                                                                                                     | Page |
|-----|---------------------------------------------|------------------------------------------------------------------------------------------------------------------------------------------------------------------------------------------------------------------------------------------------------------------------------------------------------------------------------------------|------|
|     | <b>Title and abstract</b>                   |                                                                                                                                                                                                                                                                                                                                          |      |
| S1  | Title                                       | Concise description of the nature and topic of the study identifying the study as qualitative or indicating the approach (e.g., ethnography, grounded theory) or data collection methods (e.g., interview, focus group) is recommended                                                                                                   | 1    |
| S2  | Abstract                                    | Summary of key elements of the study using the abstract format of the intended publication; typically includes objective, methods, results, and conclusions                                                                                                                                                                              | 2    |
|     | <b>Introduction</b>                         |                                                                                                                                                                                                                                                                                                                                          |      |
| S3  | Problem formulation                         | Description and significance of the problem/phenomenon studied; review of relevant theory and empirical work; problem statement                                                                                                                                                                                                          | 3-4  |
| S4  | Purpose or research question                | Purpose of the study and specific objectives or questions                                                                                                                                                                                                                                                                                | 4    |
|     | <b>Methods</b>                              |                                                                                                                                                                                                                                                                                                                                          |      |
| S5  | Qualitative approach and research paradigm  | Qualitative approach (e.g., ethnography, grounded theory, case study, phenomenology, narrative research) and guiding theory if appropriate; identifying the research paradigm (e.g., positivist, constructivist/interpretivist) is also recommended                                                                                      | 5    |
| S6  | Researcher characteristics and reflexivity  | Researchers' characteristics that may influence the research, including personal attributes, qualifications/experience, relationship with participants, assumptions, or presuppositions; potential or actual interaction between researchers' characteristics and the research questions, approach, methods, results, or transferability | 6    |
| S7  | Context                                     | Setting/site and salient contextual factors; rationale <sup>a</sup>                                                                                                                                                                                                                                                                      | 5    |
| S8  | Sampling strategy                           | How and why research participants, documents, or events were selected; criteria for deciding when no further sampling was necessary (e.g., sampling saturation); rationale <sup>a</sup>                                                                                                                                                  | 6    |
| S9  | Ethical issues pertaining to human subjects | Documentation of approval by an appropriate ethics review board and participant consent, or explanation for lack thereof; other confidentiality and data security issues                                                                                                                                                                 | 5    |
| S10 | Data collection methods                     | Types of data collected; details of data collection procedures including (as appropriate) start and stop dates of data collection and analysis, iterative process, triangulation of sources/methods, and modification of procedures in response to evolving study findings; rationale <sup>a</sup>                                       | 6    |

|                         |                                                                                              |                                                                                                                                                                                                                                                                                                       |                    |
|-------------------------|----------------------------------------------------------------------------------------------|-------------------------------------------------------------------------------------------------------------------------------------------------------------------------------------------------------------------------------------------------------------------------------------------------------|--------------------|
| S11                     | Data collection instruments and technologies                                                 | Description of instruments (e.g., interview guides, questionnaires) and devices (e.g., audio recorders) used for data collection; if/how the instrument(s) changed over the course of the study                                                                                                       | 6                  |
| S12                     | Units of study                                                                               | Number and relevant characteristics of participants, documents, or events included in the study; level of participation (could be reported in results)                                                                                                                                                | 7                  |
| S13                     | Data processing                                                                              | Methods for processing data prior to and during analysis, including transcription, data entry, data management and security, verification of data integrity, data coding, and anonymization/deidentification of excerpts                                                                              | 7                  |
| S14                     | Data analysis                                                                                | Process by which inferences, themes, etc., were identified and developed, including researchers involved in data analysis; usually references a specific paradigm or approach; rationale <sup>a</sup>                                                                                                 | 7                  |
| S15                     | Techniques to enhance trustworthiness                                                        | Techniques to enhance trustworthiness and credibility of data analysis (e.g., member checking, audit trail, triangulation); rationale <sup>a</sup>                                                                                                                                                    | 7                  |
| <b>Results/Findings</b> |                                                                                              |                                                                                                                                                                                                                                                                                                       |                    |
| S16                     | Synthesis and interpretation                                                                 | Main findings (e.g., interpretations, inferences, and themes); might include development of a theory or model, or integration with prior research or theory                                                                                                                                           | 8-14               |
| S17                     | Links to empirical data                                                                      | Evidence (e.g., quotes, field notes, text excerpts, photographs) to substantiate analytic findings                                                                                                                                                                                                    | Table 2<br>Table 3 |
| <b>Discussion</b>       |                                                                                              |                                                                                                                                                                                                                                                                                                       |                    |
| S18                     | Integration with prior work, implications, transferability, and contribution(s) to the field | Short summary of main findings; explanation of how findings and conclusions connect to, support, elaborate on, or challenge conclusions of earlier scholarship; discussion of scope of application/generalizability; identification of unique contribution(s) to scholarship in a discipline or field | 14                 |
| S19                     | Limitations                                                                                  | Trustworthiness and limitations of findings                                                                                                                                                                                                                                                           | 2, 7               |
| <b>Other</b>            |                                                                                              |                                                                                                                                                                                                                                                                                                       |                    |
| S20                     | Conflicts of interest                                                                        | Potential sources of influence or perceived influence on study conduct and conclusions; how these were managed                                                                                                                                                                                        | 18                 |
| S21                     | Funding                                                                                      | Sources of funding and other support; role of funders in data collection, interpretation, and reporting                                                                                                                                                                                               | 19                 |

<sup>a</sup>The rationale should briefly discuss the justification for choosing that theory, approach, method, or technique rather than other options available, the assumptions and limitations implicit in those choices, and how those choices influence study conclusions and transferability. As appropriate, the rationale for several items might be discussed together.

# BMJ Open

## Conducting an ongoing HIV clinical trial during the COVID-19 pandemic in Uganda: A qualitative study of research team and participants' experiences and lessons learned

|                                 |                                                                                                                                                                                                                                                                                                                                                                                                                                                                                                                                                                                                                                                                                                                                                                                                                                                                                                                                                                                                                                                                                                                                                                                                          |
|---------------------------------|----------------------------------------------------------------------------------------------------------------------------------------------------------------------------------------------------------------------------------------------------------------------------------------------------------------------------------------------------------------------------------------------------------------------------------------------------------------------------------------------------------------------------------------------------------------------------------------------------------------------------------------------------------------------------------------------------------------------------------------------------------------------------------------------------------------------------------------------------------------------------------------------------------------------------------------------------------------------------------------------------------------------------------------------------------------------------------------------------------------------------------------------------------------------------------------------------------|
| Journal:                        | <i>BMJ Open</i>                                                                                                                                                                                                                                                                                                                                                                                                                                                                                                                                                                                                                                                                                                                                                                                                                                                                                                                                                                                                                                                                                                                                                                                          |
| Manuscript ID                   | bmjopen-2021-048825.R1                                                                                                                                                                                                                                                                                                                                                                                                                                                                                                                                                                                                                                                                                                                                                                                                                                                                                                                                                                                                                                                                                                                                                                                   |
| Article Type:                   | Original research                                                                                                                                                                                                                                                                                                                                                                                                                                                                                                                                                                                                                                                                                                                                                                                                                                                                                                                                                                                                                                                                                                                                                                                        |
| Date Submitted by the Author:   | 17-Mar-2021                                                                                                                                                                                                                                                                                                                                                                                                                                                                                                                                                                                                                                                                                                                                                                                                                                                                                                                                                                                                                                                                                                                                                                                              |
| Complete List of Authors:       | Muwanguzi, Patience A. ; Makerere University, School of Health Sciences, College of Health Sciences<br>Kutyabami, Paul; Makerere University, School of Health Sciences, College of Health Sciences<br>Osingada, Charles Peter; Makerere University, School of Health Sciences, College of Health Sciences<br>Nasuuna, Esther M.; Makerere University, Infectious Diseases Institute, College of Health Sciences<br>Kitutu, Freddy; Makerere University, School of Health Sciences, College of Health Sciences<br>Ngabirano, Tom Denis; Makerere University, School of Health Sciences, College of Health Sciences<br>Nankumbi, Joyce; Makerere University, School of Health Sciences, College of Health Sciences<br>Muhindo, Richard; Makerere University, School of Health Sciences, College of Health Sciences<br>Kabiri, Lydia; Makerere University, School of Health Sciences, College of Health Sciences<br>Namutebi, Mariam; Makerere University, School of Health Sciences, College of Health Sciences<br>Nabunya, Racheal; Makerere University, School of Health Sciences, College of Health Sciences<br>Kiwankambo, Nelson; Makerere University, School of Medicine, College of Health Sciences |
| <b>Primary Subject Heading</b>: | HIV/AIDS                                                                                                                                                                                                                                                                                                                                                                                                                                                                                                                                                                                                                                                                                                                                                                                                                                                                                                                                                                                                                                                                                                                                                                                                 |
| Secondary Subject Heading:      | Public health                                                                                                                                                                                                                                                                                                                                                                                                                                                                                                                                                                                                                                                                                                                                                                                                                                                                                                                                                                                                                                                                                                                                                                                            |
| Keywords:                       | COVID-19, HIV & AIDS < INFECTIOUS DISEASES, QUALITATIVE RESEARCH                                                                                                                                                                                                                                                                                                                                                                                                                                                                                                                                                                                                                                                                                                                                                                                                                                                                                                                                                                                                                                                                                                                                         |
|                                 |                                                                                                                                                                                                                                                                                                                                                                                                                                                                                                                                                                                                                                                                                                                                                                                                                                                                                                                                                                                                                                                                                                                                                                                                          |

1  
2  
3  
4  
5  
6  
7  
8  
9  
10  
11  
12  
13  
14  
15  
16  
17  
18  
19  
20  
21  
22  
23  
24  
25  
26  
27  
28  
29  
30  
31  
32  
33  
34  
35  
36  
37  
38  
39  
40  
41  
42  
43  
44  
45  
46  
47  
48  
49  
50  
51  
52  
53  
54  
55  
56  
57  
58  
59  
60

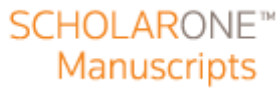

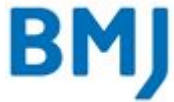

I, the Submitting Author has the right to grant and does grant on behalf of all authors of the Work (as defined in the below author licence), an exclusive licence and/or a non-exclusive licence for contributions from authors who are: i) UK Crown employees; ii) where BMJ has agreed a CC-BY licence shall apply, and/or iii) in accordance with the terms applicable for US Federal Government officers or employees acting as part of their official duties; on a worldwide, perpetual, irrevocable, royalty-free basis to BMJ Publishing Group Ltd ("BMJ") its licensees and where the relevant Journal is co-owned by BMJ to the co-owners of the Journal, to publish the Work in this journal and any other BMJ products and to exploit all rights, as set out in our [licence](#).

The Submitting Author accepts and understands that any supply made under these terms is made by BMJ to the Submitting Author unless you are acting as an employee on behalf of your employer or a postgraduate student of an affiliated institution which is paying any applicable article publishing charge ("APC") for Open Access articles. Where the Submitting Author wishes to make the Work available on an Open Access basis (and intends to pay the relevant APC), the terms of reuse of such Open Access shall be governed by a Creative Commons licence – details of these licences and which [Creative Commons](#) licence will apply to this Work are set out in our licence referred to above.

Other than as permitted in any relevant BMJ Author's Self Archiving Policies, I confirm this Work has not been accepted for publication elsewhere, is not being considered for publication elsewhere and does not duplicate material already published. I confirm all authors consent to publication of this Work and authorise the granting of this licence.

## Conducting an ongoing HIV clinical trial during the COVID-19 pandemic in Uganda: A qualitative study of research team and participants' experiences and lessons learned

Patience A. Muwanguzi<sup>1§</sup>, Paul Kutwabami<sup>1</sup>, Charles Peter Osingada<sup>1</sup>, Esther M. Nasuuna<sup>2</sup>, Freddy E. Kitutu<sup>1</sup>, Tom Denis Ngabirano<sup>1</sup>, Joyce Nankumbi<sup>1</sup>, Richard Muhindo<sup>1</sup>, Lydia Kabiri<sup>1</sup>, Mariam Namutebi<sup>1</sup>, Racheal Nabunya<sup>1</sup>, Noah Kiwanuka<sup>3</sup>, Nelson K. Sewankambo<sup>4</sup>

<sup>1</sup>School of Health Sciences, College of Health Sciences, Makerere University, Kampala, Uganda

<sup>2</sup>Infectious Diseases Institute, College of Health Sciences, Makerere University, Kampala, Uganda

<sup>3</sup>School of Public Health, College of Health Sciences, Makerere University, Kampala, Uganda

<sup>4</sup>School of Medicine, College of Health Sciences, Makerere University, Kampala, Uganda

§Corresponding author: Patience A. Muwanguzi

P. O. Box 5259, Kampala, Uganda

Phone number: +256392178085

Email: [nursepesh@gmail.com](mailto:nursepesh@gmail.com)

Email addresses of authors:

PAM: [nursepesh@gmail.com](mailto:nursepesh@gmail.com)

PK: [paulkutwabami@gmail.com](mailto:paulkutwabami@gmail.com)

CPO: [chaposingada@gmail.com](mailto:chaposingada@gmail.com)

EMN: [enasuuna@gmail.com](mailto:enasuuna@gmail.com)

FEK: [kitutufred@gmail.com](mailto:kitutufred@gmail.com)

TDN: [tomngabirano@gmail.com](mailto:tomngabirano@gmail.com)

JN: [joynankumbi@gmail.com](mailto:joynankumbi@gmail.com)

RM: [r.muhindo@yahoo.com](mailto:r.muhindo@yahoo.com)

LK: [kabdia4@gmail.com](mailto:kabdia4@gmail.com)

MN: [mariamnamutebi@gmail.com](mailto:mariamnamutebi@gmail.com)

RN: [rakelkyabs@gmail.com](mailto:rakelkyabs@gmail.com)

NK: [nkiwanuka@gmail.com](mailto:nkiwanuka@gmail.com)

NKS: [sewankam@infocom.co.ug](mailto:sewankam@infocom.co.ug)

**Keywords:** COVID-19; HIV & AIDS; Qualitative research

## Abstract

**Objective:** To explore the experiences and lessons learned by the study team and participants of the WISE-Men (Workplace-based HIV self-testing among Men) trial during the COVID-19 pandemic in Uganda.

**Design:** An explorative qualitative study comprising two virtual focus group discussions with 12 trial team members and 32 in-depth participant interviews (N=44). Data were collected via telephone calls for in-depth interviews or Zoom® for focus group discussions and manually analyzed by inductive content analysis.

**Setting:** Fourteen private security companies in two Uganda districts.

**Participants:** Members of the clinical trial study team, and men working in private security companies who undertook workplace-based HIV testing.

**Results:** The key themes for participants experiences were: 'challenges in accessing HIV treatment and care, and prevention services', 'misinformation' and 'difficulty participating in research activities'. The effects on HIV treatment and prevention resulted from; repercussions of the COVID-19 restrictions, participants fear of co-infection and negative experiences at health facilities. The difficulty in participating in research activities arose from: fear of infection with COVID-19 for the participants who tested HIV negative, transport difficulties, limited post-test psychosocial support and lack of support to initiate Pre-exposure prophylaxis.

The key study team reflections focused on the management of the clinical trial, effects of the local regulations and government policies and the need to adhere to ethical principles of research.

**Conclusions:** Findings highlight the need to organize different forms of HIV support for persons living with HIV during a pandemic. Additionally, the national research regulators and ethics committees or review boards are strongly urged to develop policies and guidelines for the continuity of research and clinical trials in the event of future shocks. Furthermore, this study calls on the appropriate government agencies to ensure public and researchers' preparedness through continuing education and support.

## Strengths and limitations of this study

- This is the first study of the experiences and lessons learned while conducting an ongoing HIV clinical trial during the COVID-19 pandemic in Uganda.



- The participants included both the clinical trial team and trial participants.
- Data were collected through in-depth interviews and focus group discussions.
- We utilized telephone calls and the Zoom® platform.
- Telephone interviews made it impossible to observe non-verbal cues during the in-depth interviews.

## Introduction

Coronavirus Disease 2019 (COVID-19) is a viral respiratory disease caused by the 2019 novel coronavirus (SARS-CoV-2)<sup>1 2</sup>. By 12, March 2021, there were 118,268,575 confirmed cases of COVID-19 worldwide, reported to the World Health Organization (WHO) with 40,544 cases and 334 deaths in Uganda<sup>3</sup>. Several countries introduced variations of social distancing restrictions ranging from the extreme of lockdown, to banning of social gatherings and quarantine of exposed individuals. While these measures may have helped to disrupt the spread of the virus, they also interrupted the delivery of other health services and the conduct of research activities. Global reports on the impact of COVID-19 on health systems are beginning to emerge. For example, because of the closure of borders and lock downs, antiretroviral (ARV) manufacturers in India reported concerns with international shipping of raw materials, thus causing delays and raising costs<sup>4</sup>. Globally, there is an expected shortage of ARVs not only because of the lockdowns, but also due to a shift of financial resources<sup>5</sup>. Consequently, HIV morbidity and mortality are expected to increase during

1  
2  
3 the pandemic and post-pandemic. A model by Jewell et al. <sup>6</sup>, predicts that a  
4 six-month supply disruption of ARVs because of COVID-19 pandemic could  
5 result in over 500,000 HIV related deaths in sub-Saharan Africa and 2-fold  
6 increase of mother to child transmission of HIV.  
7  
8  
9  
10  
11

12  
13 One of the challenges faced by the global community is how to maintain  
14 continuity of HIV care, treatment, and research programs during the COVID-  
15 19 pandemic. Emerging evidence suggests that COVID-19 has disrupted HIV  
16 services with negative implications on the attainment of the 90-90-90 targets  
17 and clinical services for people living with HIV/AIDS (PLWHA) <sup>7</sup>. In a survey  
18 conducted in February 2020 in China, 32.6% of PLWHA were at risk of  
19 antiretroviral therapy (ART) discontinuation and another 48.6% did not know  
20 where to get ARVs <sup>8</sup>. In yet another study, Sun et al. (2020) found that 22.8 % of  
21 the participants, reported medication uptake was disrupted and 67.5% worried  
22 about disruption in their medication and future care <sup>9</sup>. In the same study, some  
23 participants discontinued medication to keep their HIV status concealed <sup>9</sup>.  
24 Field notes from Kenya document how the disease has impacted HIV testing  
25 and assisted partner-notification programs <sup>10</sup>. Due to fear of acquiring the  
26 COVID-19 infection, patients hesitated to attend the clinic, and many others  
27 could not afford transport to the health facilities <sup>11</sup>.  
28  
29  
30  
31  
32  
33  
34  
35  
36  
37  
38  
39  
40  
41  
42  
43  
44  
45  
46  
47  
48  
49

50 In this study, we sought to document experiences of clinical trial study  
51 participants and reflections of the study team in the Wise-Men trial during the  
52 COVID-19 pandemic. The 'WISe-Men' trial (**W**orkplace-based HIV **S**elf-testing  
53 among **M**en) is a cluster-randomized trial assessing the effectiveness of  
54 workplace-based HIV self-testing in Uganda (Clinicaltrials.gov, ID:  
55  
56  
57  
58  
59  
60

1  
2  
3 NCT04164433). The trial started participant enrolment on February 4, 2020.  
4  
5  
6 However, new participant enrolments were halted on March 28, 2020. This  
7  
8 followed directives such as the country-wide mandatory lockdown and curfew  
9  
10 implemented by the Ugandan government and the national research  
11  
12 regulator, the Uganda National Council of Science and Technology (UNCST)<sup>12</sup>  
13  
14  
15  
16 13.

## 17 18 19 **Methods**

### 20 21 22 **WISe-Men clinical Trial**

23  
24  
25  
26  
27 This was a two-arm cluster randomized trial (CRT) involving men employed in  
28  
29 private security companies. The clusters were private security companies each  
30  
31 employing more than 50 men. The trial was conducted in two Ugandan  
32  
33 districts; Kampala and Hoima. Through randomization, Kampala district was  
34  
35 allocated to the intervention arm and Hoima to the control arm. The clusters in  
36  
37 the intervention arm received HIV Self-testing while those in the control arm  
38  
39 received standard HIV testing services. Men who worked at private security  
40  
41 companies were eligible to participate in the trial if they were 1) 18-60 years  
42  
43 old, 2) Employed >6 months within the security industry 3) Not tested for HIV  
44  
45 before or attained Negative test results for HIV  $\geq$  one year prior to enrolment.  
46  
47  
48  
49 The participants in each arm received either an HIV test or an HIV test kit with  
50  
51 planned follow-up at 1 month, 3 months and 12 months to assess linkage to care  
52  
53 or prevention services.  
54  
55  
56  
57  
58  
59  
60

### **Study design and participants**

1  
2  
3 This was an explorative qualitative sub-study nested in the WISe-Men clinical  
4 trial. The data in this study were collected during follow-up calls with trial  
5 participants. In this paper, '*study participants*' will refer to the enrolled clinical  
6 trial participants who consented to share their challenges reported in this  
7 paper.  
8  
9  
10  
11  
12  
13  
14  
15

### 16 **Ethical considerations**

17  
18  
19  
20 This sub-study ethical approval was granted by the School of Health Sciences  
21 Research and Ethics Committee at Makerere University (Ref. Number: 2018-  
22 054). Additional approval was obtained from the UNCST (Ref Number: HS 2672).  
23  
24  
25 The initial study design did not include telephone or Zoom interviews; therefore,  
26  
27  
28  
29  
30  
31  
32  
33  
34  
35  
36  
37  
38  
39  
40  
41  
42  
43  
44  
45  
46  
47  
48  
49  
50  
51  
52  
53  
54  
55  
56  
57  
58  
59  
60  
61  
62  
63  
64  
65  
66  
67  
68  
69  
70  
71  
72  
73  
74  
75  
76  
77  
78  
79  
80  
81  
82  
83  
84  
85  
86  
87  
88  
89  
90  
91  
92  
93  
94  
95  
96  
97  
98  
99  
100  
101  
102  
103  
104  
105  
106  
107  
108  
109  
110  
111  
112  
113  
114  
115  
116  
117  
118  
119  
120  
121  
122  
123  
124  
125  
126  
127  
128  
129  
130  
131  
132  
133  
134  
135  
136  
137  
138  
139  
140  
141  
142  
143  
144  
145  
146  
147  
148  
149  
150  
151  
152  
153  
154  
155  
156  
157  
158  
159  
160  
161  
162  
163  
164  
165  
166  
167  
168  
169  
170  
171  
172  
173  
174  
175  
176  
177  
178  
179  
180  
181  
182  
183  
184  
185  
186  
187  
188  
189  
190  
191  
192  
193  
194  
195  
196  
197  
198  
199  
200  
201  
202  
203  
204  
205  
206  
207  
208  
209  
210  
211  
212  
213  
214  
215  
216  
217  
218  
219  
220  
221  
222  
223  
224  
225  
226  
227  
228  
229  
230  
231  
232  
233  
234  
235  
236  
237  
238  
239  
240  
241  
242  
243  
244  
245  
246  
247  
248  
249  
250  
251  
252  
253  
254  
255  
256  
257  
258  
259  
260  
261  
262  
263  
264  
265  
266  
267  
268  
269  
270  
271  
272  
273  
274  
275  
276  
277  
278  
279  
280  
281  
282  
283  
284  
285  
286  
287  
288  
289  
290  
291  
292  
293  
294  
295  
296  
297  
298  
299  
300  
301  
302  
303  
304  
305  
306  
307  
308  
309  
310  
311  
312  
313  
314  
315  
316  
317  
318  
319  
320  
321  
322  
323  
324  
325  
326  
327  
328  
329  
330  
331  
332  
333  
334  
335  
336  
337  
338  
339  
340  
341  
342  
343  
344  
345  
346  
347  
348  
349  
350  
351  
352  
353  
354  
355  
356  
357  
358  
359  
360  
361  
362  
363  
364  
365  
366  
367  
368  
369  
370  
371  
372  
373  
374  
375  
376  
377  
378  
379  
380  
381  
382  
383  
384  
385  
386  
387  
388  
389  
390  
391  
392  
393  
394  
395  
396  
397  
398  
399  
400  
401  
402  
403  
404  
405  
406  
407  
408  
409  
410  
411  
412  
413  
414  
415  
416  
417  
418  
419  
420  
421  
422  
423  
424  
425  
426  
427  
428  
429  
430  
431  
432  
433  
434  
435  
436  
437  
438  
439  
440  
441  
442  
443  
444  
445  
446  
447  
448  
449  
450  
451  
452  
453  
454  
455  
456  
457  
458  
459  
460  
461  
462  
463  
464  
465  
466  
467  
468  
469  
470  
471  
472  
473  
474  
475  
476  
477  
478  
479  
480  
481  
482  
483  
484  
485  
486  
487  
488  
489  
490  
491  
492  
493  
494  
495  
496  
497  
498  
499  
500  
501  
502  
503  
504  
505  
506  
507  
508  
509  
510  
511  
512  
513  
514  
515  
516  
517  
518  
519  
520  
521  
522  
523  
524  
525  
526  
527  
528  
529  
530  
531  
532  
533  
534  
535  
536  
537  
538  
539  
540  
541  
542  
543  
544  
545  
546  
547  
548  
549  
550  
551  
552  
553  
554  
555  
556  
557  
558  
559  
560  
561  
562  
563  
564  
565  
566  
567  
568  
569  
570  
571  
572  
573  
574  
575  
576  
577  
578  
579  
580  
581  
582  
583  
584  
585  
586  
587  
588  
589  
590  
591  
592  
593  
594  
595  
596  
597  
598  
599  
600  
601  
602  
603  
604  
605  
606  
607  
608  
609  
610  
611  
612  
613  
614  
615  
616  
617  
618  
619  
620  
621  
622  
623  
624  
625  
626  
627  
628  
629  
630  
631  
632  
633  
634  
635  
636  
637  
638  
639  
640  
641  
642  
643  
644  
645  
646  
647  
648  
649  
650  
651  
652  
653  
654  
655  
656  
657  
658  
659  
660  
661  
662  
663  
664  
665  
666  
667  
668  
669  
670  
671  
672  
673  
674  
675  
676  
677  
678  
679  
680  
681  
682  
683  
684  
685  
686  
687  
688  
689  
690  
691  
692  
693  
694  
695  
696  
697  
698  
699  
700  
701  
702  
703  
704  
705  
706  
707  
708  
709  
710  
711  
712  
713  
714  
715  
716  
717  
718  
719  
720  
721  
722  
723  
724  
725  
726  
727  
728  
729  
730  
731  
732  
733  
734  
735  
736  
737  
738  
739  
740  
741  
742  
743  
744  
745  
746  
747  
748  
749  
750  
751  
752  
753  
754  
755  
756  
757  
758  
759  
760  
761  
762  
763  
764  
765  
766  
767  
768  
769  
770  
771  
772  
773  
774  
775  
776  
777  
778  
779  
780  
781  
782  
783  
784  
785  
786  
787  
788  
789  
790  
791  
792  
793  
794  
795  
796  
797  
798  
799  
800  
801  
802  
803  
804  
805  
806  
807  
808  
809  
810  
811  
812  
813  
814  
815  
816  
817  
818  
819  
820  
821  
822  
823  
824  
825  
826  
827  
828  
829  
830  
831  
832  
833  
834  
835  
836  
837  
838  
839  
840  
841  
842  
843  
844  
845  
846  
847  
848  
849  
850  
851  
852  
853  
854  
855  
856  
857  
858  
859  
860  
861  
862  
863  
864  
865  
866  
867  
868  
869  
870  
871  
872  
873  
874  
875  
876  
877  
878  
879  
880  
881  
882  
883  
884  
885  
886  
887  
888  
889  
890  
891  
892  
893  
894  
895  
896  
897  
898  
899  
900  
901  
902  
903  
904  
905  
906  
907  
908  
909  
910  
911  
912  
913  
914  
915  
916  
917  
918  
919  
920  
921  
922  
923  
924  
925  
926  
927  
928  
929  
930  
931  
932  
933  
934  
935  
936  
937  
938  
939  
940  
941  
942  
943  
944  
945  
946  
947  
948  
949  
950  
951  
952  
953  
954  
955  
956  
957  
958  
959  
960  
961  
962  
963  
964  
965  
966  
967  
968  
969  
970  
971  
972  
973  
974  
975  
976  
977  
978  
979  
980  
981  
982  
983  
984  
985  
986  
987  
988  
989  
990  
991  
992  
993  
994  
995  
996  
997  
998  
999  
1000

### 36 **Patient and Public Involvement**

37  
38  
39  
40 No patient involved. Patients or the public were not involved in the design, or  
41  
42  
43  
44  
45  
46  
47  
48  
49  
50  
51  
52  
53  
54  
55  
56  
57  
58  
59  
60

### 46 **Data Collection**

47  
48  
49 Data were collected from a combination of in-depth interviews and virtual  
50  
51  
52  
53  
54  
55  
56  
57  
58  
59  
60

### ***In-depth participant interviews***

Two research team members experienced in qualitative research conducted the in-depth interviews (IDIs). Participants were purposefully sampled to include men from different employee ranks, age categories (18-25, 36-35, 36-45 and 46-64) and HIV status (positive and negative). The interview guide was tested and developed iteratively at three pilot interviews to refine the questions (See supplementary file 1). The participants in the pilot interviews gave consent prior to participation in the study. The interview guide collected data about participants' experiences, challenges and lessons learned while participating in all the trial activities during the COVID-19 pandemic. Phone interviews were conducted in August and September 2020 and each lasted 45 minutes to an hour.

### ***Research team reflections***

Reflections from the research team were collected during the daily de-brief meetings. The reflections were collected in two ways; face-to-face in-depth interviews (IDIs) between March 15, to March 30, 2020, and virtual focus group discussions (FGDs) between June 1, to June 11, 2020 using the Zoom platform. The FGDs had 6 team members per group. All the team members were informed that these reflections were part of the study, and informed consent was sought. The meetings lasted 45 minutes to one hour, led by a moderator and note-taker. Both the FGD and IDI utilised an open guide with the question "*What were today's experiences, successes, challenges and lessons learned from conducting the WISE-Men trial during the COVID-19 pandemic?*" This

1  
2  
3 question was incorporated into the clinical trial following ethics approval to  
4  
5 modify the design during the unanticipated COVID-19 pandemic.  
6  
7

## 8 9 **Data Analysis**

10  
11  
12 The phone interview recordings were transcribed verbatim. The minutes from  
13  
14 each de-brief meeting were typed up after each meeting and archived. Both  
15  
16 the participant and study team data were analyzed manually using inductive  
17  
18 content analysis. This process entailed open coding, developing emergent  
19  
20 categories and conceptualization<sup>14</sup>. Two groups (PAM/RN and FEK/JN)  
21  
22 reviewed the transcripts independently. The pairs identified codes separately  
23  
24 and then discussed them to achieve consensus. Any disagreements on the  
25  
26 codes were settled by discussion with other members of the study team  
27  
28 (TDN/EMN/CPO). The coders iteratively named and re-named the codes as  
29  
30 more insights and latent meanings emerged from the data. The codes were  
31  
32 then grouped into categories and subcategories.  
33  
34  
35  
36  
37  
38

39  
40 The research team members who took part in the de-brief meetings did not  
41  
42 analyze the data.  
43

44  
45 To ensure trustworthiness and credibility of the data, a sample of the study  
46  
47 participants reviewed the categories and subcategories. The sample (n=7)  
48  
49 included one participant from each of the different employee ranks, different  
50  
51 age groups, different HIV status and 2 members from the research team. The  
52  
53 reviewers read through the identified categories and sub-categories to  
54  
55 validate them as a true representation of their perspectives of participating in  
56  
57 an ongoing clinical trial during a pandemic. The participants corroborated  
58  
59  
60

1  
2  
3 most of the identified categories and sub-categories, except one category  
4  
5 'Wrong information' which was changed to 'misinformation'. Interview notes  
6  
7 were recorded in the principal researcher's reflective journal for confirmability.  
8  
9

## 10 11 12 **Results**

### 13 14 15 16 **Participant's characteristics**

17  
18  
19 In total we interviewed 44 participants, the majority of the clinical trial  
20  
21 participants were 18-25 years old, and mostly security guards. The trial  
22  
23 participants in this study (n=32) had all received HIV testing services as part of  
24  
25 the clinical trial and 10 (31.2%) were newly diagnosed as HIV positive. See table  
26  
27  
28  
29  
30  
31  
32  
33  
34  
35  
36  
37  
38  
39  
40  
41  
42  
43  
44  
45  
46  
47  
48  
49  
50  
51  
52  
53  
54  
55  
56  
57  
58  
59  
60  
1.

### 33 34 35 36 **Participants' challenges**

37  
38  
39  
40  
41  
42  
43  
44  
45  
46  
47  
48  
49  
50  
51  
52  
53  
54  
55  
56  
57  
58  
59  
60  
Three themes emerged from the participants' experiences. The themes,  
categories, and sub-categories are presented in Figure 1.

**Figure 1:** Coding tree for the participants experiences of participating in an ongoing HIV clinical trail during a pandemic

### 47 48 49 50 51 52 53 54 55 56 57 58 59 60 **Challenges in accessing HIV treatment and care, or prevention services**

Participants reported challenges in seeking and accessing HIV treatment and care or prevention services. The narrative quotes are presented in table 2.

### ***Difficulty accessing treatment facilities***

Several participants who had recently started on ART were unable to continue with their treatment due to difficulty in accessing the health facility following the stay-at-home directives among other reasons. During the COVID-19 lockdown and curfew period in Uganda, only essential personnel who had special car stickers or travel in vehicles with special government permission were permitted to drive personal cars. Additionally, during this time, many worksites were closed. The study participants had previously selected health facilities that were close to their workplaces for their HIV care. They expressed difficulty in walking to and from their homes to the health facility to access their treatment.

### ***Interruptions in HIV treatment schedule***

A few participants experienced interruptions in their treatment schedule due to issues of non-disclosure of their HIV status and inability to explain the daily medication to their partner. They reported that they typically keep their medications at the workplace where they can easily take them without intrusive questioning from family members.

### ***Fear of co-infection with COVID-19***

Study participants who tested positive for HIV expressed concern about being more at risk of COVID-19 infection because it was widely circulated that men, older people, and those with pre-existing comorbidities were more susceptible to infection.



### ***Difficulty in transferring HIV care to new facilities***

During the lockdown period, some participants travelled to their home villages to stay with their families. While they were there, they visited nearby hospitals for drug refills, however, some were denied the opportunity to transfer their care to new ART treatment facilities.

### ***Limited HIV treatment support at health facilities***

Some of the participants experienced some side effects following ART initiation. One suffered from severe stomach upsets and skin changes which he attributed to the ART treatment. Unfortunately, he was not able to access the hospital where he was receiving HIV care. He felt unsupported and still reports difficulty coping with the new treatment.

### ***Need for PrEP initiation support***

One of the participants who was undergoing counselling to commence PrEP, reported that he lacked the confidence to start without face-to-face support.

### **Mitigation measures for trial participants challenges in accessing HIV treatment, care or prevention services**

As a result of the challenges experienced by study participants, the trial team implemented some mitigation measures to ensure that the participants received their treatment or had access to prevention services.

- i. Home delivery of ART by study counsellors for participants who needed refills, these visits were also useful for follow-up assessments, and counselling for study participants and their partners.

- ii. Delivery of ART to community pick-up points for participants who were not willing to receive the study team members in their homes.
- iii. Follow-up phone calls from the study counsellors and nurses for participants who returned reactive HIV self-test kits and needed further counselling for ART initiation. During these counselling sessions, further information was provided regarding COVID-19.
- iv. Home and community delivery of condoms for all study participants.
- v. Active linkage of participants to clinics for further counselling and initiation of PrEP.
- vi. Provision of letters and health information to health facilities that enabled the participants to link to HIV care and treatment at new facilities.

### **Misinformation**

At the start of the pandemic, there was a lot of information shared via several social media platforms. Participants reported that this information influenced their decisions regarding HIV treatment. The narrative quotes are presented in table 2.

### ***Incorrect information about COVID-19***

Some participants reported that they received wrong information from their peers. For example, some participants were informed that PLWHA who were on ART were more likely to get infected with COVID-19. Therefore, some participants stopped taking their medication. Other participants who tested HIV negative were initially unwilling to follow the COVID-19 guidelines. They

1  
2  
3 reported that their peers informed them that only people with underlying  
4 disease conditions were at risk for infection with the Corona virus. The WISE-  
5 Men trial had also involved blood pressure, blood glucose and syphilis tests.  
6  
7 Therefore, some of the participants who tested negative for all the tests, were  
8  
9  
10  
11  
12  
13  
14  
15  
16  
17  
18  
19  
20  
21  
22  
23  
24  
25  
26  
27  
28  
29  
30  
31  
32  
33  
34  
35  
36  
37  
38  
39  
40  
41  
42  
43  
44  
45  
46  
47  
48  
49  
50  
51  
52  
53  
54  
55  
56  
57  
58  
59  
60

### ***Unforeseen effects of peer information on ART adherence***

A few participants heard about Remdesivir as a potential drug for use in treatment of COVID-19. Their colleagues suggested that it was like the HIV antiretroviral medication. This erroneously encouraged adherence to their ART regimen as they thought it would lower their risk of COVID-19 infection.

### ***Difficulty participating in research activities***

The other main experience involved the participants' difficulty in taking part in follow-up research activities as part of the clinical trial. The narrative quotes are presented in table 2.

### ***Transport difficulties***

Following enrolment into the trial, all participants were meant to return for follow-up visits after 1 week, one month and then at three months. This was for participants who tested HIV positive and HIV negative. Unfortunately, the stay-at-home orders made this impossible and those who tested HIV negative were unwilling to spend their money and face the inconvenience to travel to the research sites. The research team then changed to follow-up phone calls;

1  
2  
3 however, some participants had poor telephone network connectivity and  
4  
5 therefore missed these calls.  
6  
7

### 8 9 ***Fear of exposure to COVID-19***

10  
11 Participants were concerned about the likelihood of exposure to the  
12 coronavirus at the research site. They requested for a significant risk allowance  
13 for in-person visits during the pandemic. This was expressed more among  
14 participants who returned negative test results. They felt that there was no  
15 need to put themselves in danger of exposure to COVID-19 since they had  
16 already tested HIV negative.  
17  
18  
19  
20  
21  
22  
23  
24  
25

### 26 27 ***Limited post-test psychosocial support***

28  
29 Some participants tested HIV positive for the first time and were still in denial.  
30 They reported the unmet need of support with adherence, coping with taking  
31 ART, dealing with side effects, and assisted partner notification.  
32  
33  
34  
35  
36  
37

### 38 39 **Study team reflections of managing a clinical trial during the COVID-19** 40 **pandemic**

41  
42 The study team reflected on their experiences of conducting an ongoing  
43 clinical trial during the COVID-19 pandemic. The coding tree is in figure 2 and  
44 the categories and narrative quotes are presented in table 3.  
45  
46  
47  
48  
49  
50

51  
52 **Figure 2:** Coding tree for the clinical trial study team of managing an ongoing HIV  
53 clinical trail during a pandemic  
54  
55

### 56 57 **Effects of local regulations and government policies**

1  
2  
3 On March 25, 2020, the government of Uganda suspended public transport  
4 and placed restrictions on private vehicle movements, while on March 30, the  
5  
6 President declared a nationwide lockdown and curfew <sup>12</sup>. On March 27, the  
7  
8 UNCSST banned the recruitment of new study participants. Researchers were  
9  
10 also directed to halt face-to-face follow-up visits of the already recruited  
11  
12 participants indefinitely <sup>13</sup>. This had ripple effects on both the management  
13  
14 and continuity of the clinical trial.  
15  
16  
17  
18  
19  
20

## 21 **Clinical trial management**

### 22 ***Trial design modifications***

23  
24  
25 This was a cluster randomized design where two districts were randomly  
26  
27 assigned to receive the intervention which was HIV self-testing and the  
28  
29 standard HIV testing services to the control arm. During this time, several trial  
30  
31 participants travelled back to their home villages or ancestral homes. The study  
32  
33 team expressed concern that this may have unintentionally caused  
34  
35 'contamination' among the individuals, since participants in both the control  
36  
37 and intervention clusters could have interacted in the villages. Evidence is still  
38  
39 being sought regarding whether there was study contamination.  
40  
41  
42  
43  
44  
45  
46  
47  
48

### 49 ***Budget and procurement alterations***

50  
51 The trial started enrolment on 4, February 2020, and the first COVID-19 case in  
52  
53 Uganda was reported on 21, March 2020 <sup>12</sup>. The study team therefore incurred  
54  
55 unanticipated purchases and budget modifications to ensure continuity of  
56  
57 study activities, and safety of the team and participants.  
58  
59  
60

### ***Supply chain interruptions***

A prominent implication of the COVID-19 pandemic was the degree to which services were entirely shut down. This meant that there were interruptions in procuring and obtaining equipment and materials needed for crucial elements of the clinical trial, which led to a delay in research activities.

### ***Human resource considerations***

The study team members reported low levels of COVID-19 health literacy. The trial directors hired more staff who had received training in infection prevention and control (IPC) measures for COVID-19. The new personnel conducted screening, 4 hourly surface disinfection and provided training and education for study participants. Other precautionary measures are highlighted in table 3. Additionally, the trial suffered some personnel losses since some team members were unable to continue participating in the research activities.

### ***Loss to follow-up (LTFU) of enrolled participants***

Some security companies downsized, and participants lost their jobs, therefore, they had to be removed from the trial as they no longer met the inclusion criteria. Others could not be reached due to their poor phone network connectivity, while others simply refused to take calls from the study team.

### ***Adherence to ethical principles of research***

#### ***Ethical approvals for protocol deviations***

The trial protocol and consent forms were modified to reflect the changes mentioned in table 3 and submitted to the review board for approval before

1  
2  
3 the trial could proceed. The research team felt that the modifications were  
4  
5 minor and did not necessitate a complete discontinuation of the trial.  
6  
7 However, because of the COVID-19 restrictions, there was a substantial delay  
8  
9 before this was approved.  
10  
11  
12

### 13 ***Balancing risks and benefits***

14  
15  
16  
17 The study team conducted daily assessments of predictable risks to both the  
18  
19 staff and the trial participants in comparison with potential benefits. The trial  
20  
21 was eventually halted, and several contingency plans were initiated to ensure  
22  
23 safe continuity of some research activities.  
24  
25  
26  
27

### 28 **Discussion**

29  
30  
31 This sub-study explored the trial team and participants' experiences of  
32  
33 participating in an ongoing clinical trial during a pandemic. Three themes  
34  
35 emerged for the participants' experiences: effects on accessing HIV treatment  
36  
37 and care, misinformation and difficulty participating in research activities. The  
38  
39 study team reflections focused on the management of the clinical trial, effects  
40  
41 of the local regulations and government policies and the need to adhere to  
42  
43 ethical principles of research.  
44  
45  
46  
47

48  
49 One of the greatest implications for this clinical trial were the knock-on effects  
50  
51 of the local regulations and government policies. In March 2020, the  
52  
53 government of Uganda enforced several COVID-19 restrictions including travel  
54  
55 bans, border closures, nationwide lockdowns and curfews, and suspension of  
56  
57 mass gatherings <sup>12</sup>. While this strategy maybe efficacious in preventing the  
58  
59  
60

1  
2  
3 transmission of COVID-19, it could aggravate non-COVID-19 related health  
4  
5 outcomes <sup>15</sup>. Additionally, as in this study, these effects may include difficulties  
6  
7 in accessing lifesaving treatment, or participating in research activities.  
8  
9  
10 Furthermore, results from mathematical modelling suggest that interruption to  
11  
12 condom supply and health education could make populations more  
13  
14 vulnerable to increases in HIV incidence. <sup>16</sup>. In agreement with <sup>17</sup>, this suggests  
15  
16 the need for appropriate government agencies and research regulatory  
17  
18 bodies to develop systems that can ensure continuity of essential services and  
19  
20 research even when lockdowns and travel bans are in effect. Research and  
21  
22 ethics committees might consider asking researchers conducting trials in HIV,  
23  
24 to submit a contingency plan if participants are unable to access their  
25  
26 treatment and care.  
27  
28  
29  
30  
31

32  
33 An important consideration is the need to plan for different forms of support for  
34  
35 research participants and PLWHA during a pandemic. The difficulty in  
36  
37 continuing ART treatment was a recurring issue among many of the  
38  
39 participants who missed clinic visits. This agrees with Opio and colleagues in  
40  
41 Uganda who reported some of the major reasons for loss to follow up (LTFU) as  
42  
43 the long distance from home to the health facility for drug replenishment and  
44  
45 limited capacity at lower level ART clinics <sup>18</sup>. In hindsight, HIV research teams  
46  
47 could have provided participants with transfer letters to new facilities or home  
48  
49 delivery of ART <sup>19</sup>. For example, the research team from a Tuberculosis clinical  
50  
51 trial made arrangements for delivery of medicines to the homes of participants  
52  
53 who gave prior consent <sup>20</sup>. Another form of support could be psychosocial  
54  
55  
56  
57  
58  
59  
60



1  
2  
3 support where participants are availed a phone number that they can  
4  
5 contact for any further pertinent discussions or a routine follow-up phone call  
6  
7 in the absence of in-person visits. At the policy level, Rewari and colleagues  
8  
9 recommend instituting measures and guidelines to minimize ART supply shocks  
10  
11 and to prepare for future emergencies <sup>4</sup>.  
12  
13  
14  
15

16 Another challenge that the research participants faced was the  
17  
18 misinformation regarding COVID-19. Some participants halted their treatment  
19  
20 because of misinformation from their peers about the relationship between  
21  
22 ART and infection with COVID-19. Coincidentally, the information from peers  
23  
24 encouraged adherence to ART. This followed reports that patients with both  
25  
26 HIV and SARS-CoV-2 co-infected patients may have a less severe clinical  
27  
28 picture of COVID-19 if they are already receiving ART <sup>21</sup>. Unfortunately, they  
29  
30 altered the information that people on ART were less likely to get the COVID-  
31  
32 19 infection. To prevent this, researchers should make every effort to get well  
33  
34 informed about a new health threat (within the limits of available information),  
35  
36 so that they can advise participants appropriately but also make robust plans  
37  
38 on how to manage the research. Researchers are therefore encouraged to  
39  
40 design information and initiatives to advance research literacy and serve as a  
41  
42 source for correct information. This will maintain trust and encourage  
43  
44 continued participation and engagement <sup>22-24</sup> and prevent unnecessary fear  
45  
46 and distress <sup>25</sup>. Participants should receive regular practical tips on handling  
47  
48 the disruption in their work life and giving them hope that normal research  
49  
50 activities will resume once the pandemic abates <sup>26-28</sup>.  
51  
52  
53  
54  
55  
56  
57  
58  
59  
60

1  
2  
3 The principle of beneficence requires those in positions of responsibility to act  
4 with the best intentions for all those under their jurisdiction <sup>29</sup>, therefore trial  
5 managers must be cognizant of maintaining the integrity of the trial whilst  
6 ensuring the safety of the participants <sup>30</sup>. The COVID-19 pandemic poses  
7 potential serious risks for clinical trial participants and staff engaged in health  
8 research. Researchers should ensure that participant safety is always supreme  
9  
10  
11  
12  
13  
14  
15  
16  
17  
18  
19  
20  
21  
22  
23  
24  
25  
26  
27  
28  
29  
30  
31  
32  
33  
34  
35  
36  
37  
38  
39  
40  
41  
42  
43  
44  
45  
46  
47  
48  
49  
50  
51  
52  
53  
54  
55  
56  
57  
58  
59  
60

29. For instance researchers may close a clinical trial where the risk of exposure to coronavirus is high <sup>20</sup>. Anker and colleagues discourage the hasty permanent termination of ongoing clinical trials unless they are nearing planned completion or have not yet started <sup>30</sup>. In this case, we initially stopped all procedures that prevented the social distancing requirements such as venepuncture. Eventually, we halted participant recruitment and face-to-face follow up visits.

Before the pandemic, many researchers only used in-person methods for follow up-visits. This period has seen clinical researchers consider several other options including the use of mobile apps, and other remote platforms to conduct research visits <sup>26</sup>. In this study, we used both Zoom and phone interviews to collect the follow-up data for the clinical trial. The telephone interviews drastically improved the time efficiency for following up participants, reduced the expenditure for participants' transport compensation, and provided access to participants who were geographically distant or located in high COVID-19 transmission areas. This agrees with Block and Erskine, <sup>31</sup> that telephones give researchers access to diverse resources and experiences

1  
2  
3 without the inconvenience, the expense and the time expended in travel.  
4  
5 However, the phone follow-up was a challenge for some participants who  
6  
7 developed reactions to the HIV medication and those who needed support  
8  
9 with initiating PrEP. Additionally, several ethical issues and unscrupulous  
10  
11 behaviors may also arise from the use of these new methods like Zoom such as  
12  
13 potential abuse and exploitation <sup>32 33</sup>. Potential difficulties such as lack of  
14  
15 technology expertise, confidentiality challenges, reimbursement matters <sup>34</sup>,  
16  
17 poor phone network, and low internet connectivity need to be addressed first.  
18  
19 The strength of the study lies in the opportunity to get both research team and  
20  
21 participants' perceptions about conducting or participating in a clinical trial  
22  
23 during a pandemic. One limitation of the study may have been the methods  
24  
25 of data collection. With phone interviews, it was neither possible to observe  
26  
27 non-verbal cues during the IDIs, nor the non-verbal interaction of participants  
28  
29 during the FGDs. Additionally, study team members may have participated  
30  
31 out of an obligation to the trial team leaders. This was mitigated by requesting  
32  
33 written consent prior to participation in the study, and the constant reminder  
34  
35 that it was not mandatory to participate, and non-participation would not  
36  
37 affect their employment in the study trial.  
38  
39  
40  
41  
42  
43  
44  
45  
46  
47  
48

## 49 **Conclusions and policy implications**

50  
51  
52 The major implications for participants were the challenges in accessing HIV  
53  
54 treatment and care, misinformation, and difficulty in participating in research  
55  
56 activities. The major effects on the trial from the research team perspectives,  
57  
58 were the cumulative effects of local regulations, the unforeseen protocol  
59  
60

1  
2  
3 modifications, and the ethics committee reporting requirements. Responsible  
4 government agencies and research regulators are strongly encouraged to  
5  
6 develop policies and guidelines in preparedness for the continuity of research  
7  
8 and clinical trials in the event of future pandemics or epidemics.  
9  
10  
11  
12  
13  
14

### 15 **Competing interests**

16  
17 The authors declare that they have no competing interests.  
18  
19  
20  
21

### 22 **Data availability statement**

23  
24 Data will be made available upon reasonable request.  
25  
26  
27  
28  
29

### 30 **Authors' contributions**

31  
32 **PAM** is the Principal Investigator of the WISE-Men clinical trial and was involved  
33 in data collection, analysis and drafting the manuscript. **RN** is the WISE-Men  
34 trial manager and was involved in data collection, analysis and drafting the  
35 manuscript. **NK** and **NKS** are both co-investigators and supervisors on the WISE-  
36 Men trial, were involved in designing the study and critically revised the  
37 manuscript for important intellectual content. **TDN** is a co-investigator on the  
38 WISE-Men trial and was involved in conceptualizing the study and drafting the  
39 work. **PK** and **RM** made substantial contribution to the conception of the study,  
40 and critically revised the manuscript for important intellectual content  
41 especially around IRB and ethical issues. **EMN** made substantial contribution to  
42 the design of the study and was involved in data analysis and drafting the  
43 work. **JN** and **FEK** were critical in inductive content analysis of the findings from  
44  
45  
46  
47  
48  
49  
50  
51  
52  
53  
54  
55  
56  
57  
58  
59  
60

1  
2  
3 IDI and FGD's and critically revised the manuscript for important intellectual  
4 content related to access to HIV treatment and care. **CPO** was involved in the  
5 early conception of the study, generation of study themes and drafting the  
6 work, **LK** and **MN** were involved in data collection from both trial team  
7 members and study participants and critically revised the manuscript for  
8 important intellectual content, specifically the methods section.  
9  
10  
11  
12  
13  
14  
15  
16  
17

18 All the authors gave final approval of the work to be published. All authors  
19 agree to be accountable for all aspects of the work in ensuring that questions  
20 related to the accuracy or integrity of any part of the work are appropriately  
21 investigated and resolved.  
22  
23  
24  
25  
26  
27  
28  
29  
30

### 31 **Acknowledgements**

32  
33 This project was made possible by a NURTURE fellowship award funded under  
34 training Grant Number D43TW010132 (PI: Nelson K. Sewankambo) from the  
35 Fogarty International Center of the National Institutes of Health. The funders  
36 had no role in study design, data collection and analysis, decision to publish,  
37 or preparation of the manuscript. The contents are solely the responsibility of  
38 the authors and do not necessarily represent the official views of the supporting  
39 institutions.  
40  
41  
42  
43  
44  
45  
46  
47  
48  
49

50 The authors acknowledge all the members of the WISe-Men Trial team and the  
51 trial participants who soldiered on during the COVID-19 pandemic, despite the  
52 ensuing lockdown and travel restrictions in Uganda. Your courage made this  
53 study possible.  
54  
55  
56  
57  
58  
59  
60

**List of abbreviations**

|          |                                                    |
|----------|----------------------------------------------------|
| ART      | Antiretroviral Therapy                             |
| ARV      | Antiretroviral                                     |
| CRT      | Cluster Randomised Trial                           |
| COVID-19 | Corona virus disease                               |
| FGD      | Focus Group Discussion                             |
| HIVST    | HIV Self-testing                                   |
| HTS      | HIV Testing Services                               |
| IDI      | In-depth interview                                 |
| IPC      | Infection prevention and control                   |
| IRB      | Institutional Review Board                         |
| LTFU     | Loss to follow-up                                  |
| MoH      | Ministry of Health                                 |
| PI       | Principal Investigator                             |
| PLWHA    | people living with HIV/AIDS                        |
| PPE      | Personal protective equipment                      |
| PrEP     | Pre-exposure prophylaxis                           |
| SOPs     | Standard operating procedures                      |
| UNAIDS   | Joint United Nations Programme on HIV/AIDS         |
| UNCST    | Uganda National Council for Science and Technology |
| WHO      | World Health Organisation                          |

## References

1. Gorbalenya AE, Baker SC, Baric RS, et al. Severe acute respiratory syndrome-related coronavirus: The species and its viruses—a statement of the Coronavirus Study Group. *bioRxiv* 2020. DOI 2020;10(2020.02):07.937862.
2. Coronaviridae Study Group of the International Committee on Taxonomy of V. The species Severe acute respiratory syndrome-related coronavirus: classifying 2019-nCoV and naming it SARS-CoV-2. *Nat Microbiol* 2020;5(4):536-44. doi: 10.1038/s41564-020-0695-z [published Online First: 03/02]
3. WHO. WHO Coronavirus Disease (COVID-19) Dashboard 2020 [Available from: <https://covid19.who.int/> accessed June 13, 2020.
4. Rewari BB, Mangadan-Konath N, Sharma M. Impact of COVID-19 on the global supply chain of antiretroviral drugs: a rapid survey of Indian manufacturers. *WHO South East Asia J Public Health* 2020;9(2):126-33. doi: 10.4103/2224-3151.294306 [published Online First: 2020/09/27]
5. Oladele TT, Olakunde BO, Oladele EA, et al. The impact of COVID-19 on HIV financing in Nigeria: a call for proactive measures. *BMJ global health* 2020;5(5) doi: 10.1136/bmjgh-2020-002718 [published Online First: 2020/05/22]
6. Jewell BL, Mudimu E, Stover J, et al. Potential effects of disruption to HIV programmes in sub-Saharan Africa caused by COVID-19: results from multiple mathematical models. *The Lancet HIV* 2020
7. Jiang H, Zhou Y, Tang W. Maintaining HIV care during the COVID-19 pandemic. *The lancet HIV* 2020;7(5):e308-e09. doi: 10.1016/s2352-3018(20)30105-3 [published Online First: 2020/04/10]
8. Guo W, Weng HL, Bai H, et al. [Quick community survey on the impact of COVID-19 outbreak for the healthcare of people living with HIV]. *Zhonghua Liu Xing Bing Xue Za Zhi* 2020;41(5):662-66. doi: 10.3760/cma.j.cn112338-20200314-00345 [published Online First: 2020/04/01]
9. Sun S, Hou J, Chen Y, et al. Challenges to HIV Care and Psychological Health During the COVID-19 Pandemic Among People Living with HIV in China. *AIDS Behav* 2020:1-2. doi: 10.1007/s10461-020-02903-4 [published Online First: 2020/05/10]
10. Lagat H, Sharma M, Kariithi E, et al. Impact of the COVID-19 Pandemic on HIV Testing and Assisted Partner Notification Services, Western Kenya. *AIDS Behav* 2020:1-4. doi: 10.1007/s10461-020-02938-7 [published Online First: 2020/06/04]
11. Linnemayr S, Jennings Mayo-Wilson L, Saya U, et al. HIV Care Experiences During the COVID-19 Pandemic: Mixed-Methods Telephone Interviews with Clinic-Enrolled HIV-Infected Adults in Uganda. *AIDS Behav* 2020 doi: 10.1007/s10461-020-03032-8
12. GOU. COVID-19 Response info hub-Timeline 2020 [Available from: <https://covid19.gou.go.ug/timeline.html> accessed 06/11/2020 2020.
13. UNCST. New research registration procedures 20202 [Available from: <https://www.uncst.go.ug/new-research-registration-procedures/> accessed June 13, 2020.
14. Elo S, Kyngäs H. The qualitative content analysis process. *Journal of advanced nursing* 2008;62(1):107-15.
15. Mhango M, Chitungo I, Dzinamarira T. COVID-19 Lockdowns: Impact on Facility-Based HIV Testing and the Case for the Scaling Up of Home-Based Testing Services in Sub-Saharan Africa. *AIDS Behav* 2020:1.



16. Jewell BL, Mudimu E, Stover J, et al. Potential effects of disruption to HIV programmes in sub-Saharan Africa caused by COVID-19: results from multiple mathematical models. *The Lancet HIV* 2020;7(9):e629-e40.
17. Pierre G, Uwizeza A, Dzinamarira T. Attendance to HIV antiretroviral collection clinic appointments during COVID-19 lockdown. A Single Center Study in Kigali, Rwanda. *AIDS Behav* 2020:1-3.
18. Opio D, Semitala FC, Kakeeto A, et al. Loss to follow-up and associated factors among adult people living with HIV at public health facilities in Wakiso district, Uganda: a retrospective cohort study. *BMC health services research* 2019;19(1):628. doi: 10.1186/s12913-019-4474-6
19. Rebeiro PF, Duda SN, Wools-Kaloustian KK, et al. Implications of COVID-19 for HIV Research: data sources, indicators and longitudinal analyses. *Journal of the International AIDS Society* 2020;23(10):e25627. doi: 10.1002/jia2.25627
20. Rusen ID. Challenges in Tuberculosis Clinical Trials in the Face of the COVID-19 Pandemic: A Sponsor's Perspective. *Trop Med Infect Dis* 2020;5(2) doi: 10.3390/tropicalmed5020086 [published Online First: 2020/05/31]
21. Patel RH, Pella PM. COVID-19 in a patient with HIV infection. *Journal of Medical Virology* 2020
22. Gobat N, Butler CC, Mollison J, et al. What the public think about participation in medical research during an influenza pandemic: an international cross-sectional survey. *Public Health* 2019;177:80-94. doi: 10.1016/j.puhe.2019.07.005 [published Online First: 2019/09/27]
23. Sentell T, Vamos S, Okan O. Interdisciplinary Perspectives on Health Literacy Research Around the World: More Important Than Ever in a Time of COVID-19. *International journal of environmental research and public health* 2020;17(9) doi: 10.3390/ijerph17093010 [published Online First: 2020/05/03]
24. Bikson M, Hanlon CA, Woods AJ, et al. Guidelines for TMS/tES clinical services and research through the COVID-19 pandemic. *Brain Stimul* 2020;13(4):1124-49. doi: 10.1016/j.brs.2020.05.010 [published Online First: 2020/05/16]
25. Shah SGS, Farrow A. A commentary on "World Health Organization declares global emergency: A review of the 2019 novel Coronavirus (COVID-19)". *Int J Surg* 2020;76:128-29. doi: 10.1016/j.ijssu.2020.03.001 [published Online First: 2020/03/15]
26. Padala PR, Jendro AM, Padala KP. Conducting Clinical Research During the COVID-19 Pandemic: Investigator and Participant Perspectives. *JMIR Public Health Surveill* 2020;6(2):e18887. doi: 10.2196/18887 [published Online First: 2020/04/07]
27. Dunlop A, Lokuge B, Masters D, et al. Challenges in maintaining treatment services for people who use drugs during the COVID-19 pandemic. *Harm Reduct J* 2020;17(1):26. doi: 10.1186/s12954-020-00370-7 [published Online First: 2020/05/08]
28. Osseni IA. COVID-19 pandemic in sub-Saharan Africa: preparedness, response, and hidden potentials. *Tropical Medicine and Health* 2020;48(1):48. doi: 10.1186/s41182-020-00240-9
29. Hlongwa P. Current ethical issues in HIV/AIDS research and HIV/AIDS care. *Oral diseases* 2016;22 Suppl 1:61-5. doi: 10.1111/odi.12391 [published Online First: 2016/04/26]
30. Anker SD, Butler J, Khan MS, et al. Conducting clinical trials in heart failure during (and after) the COVID-19 pandemic: an Expert Consensus Position Paper from the Heart Failure Association (HFA) of the European Society of Cardiology



- 1  
2  
3 (ESC). *Eur Heart J* 2020;41(22):2109-17. doi: 10.1093/eurheartj/ehaa461  
4 [published Online First: 2020/06/05]  
5  
6 31. Block ES, Erskine L. Interviewing by telephone: Specific considerations,  
7 opportunities, and challenges. *International journal of qualitative methods*  
8 2012;11(4):428-45.  
9  
10 32. Bashshur R, Doarn CR, Frenk JM, et al. Telemedicine and the COVID-19 Pandemic,  
11 Lessons for the Future. *Telemed J E Health* 2020;26(5):571-73. doi:  
12 10.1089/tmj.2020.29040.rb [published Online First: 2020/04/11]  
13  
14 33. Hau YS, Kim JK, Hur J, et al. How about actively using telemedicine during the  
15 COVID-19 pandemic? *J Med Syst* 2020;44(6):108. doi: 10.1007/s10916-020-  
16 01580-z [published Online First: 2020/05/01]  
17  
18 34. Wright JH, Caudill R. Remote Treatment Delivery in Response to the COVID-19  
19 Pandemic. *Psychother Psychosom* 2020;89(3):130-32. doi: 10.1159/000507376  
20 [published Online First: 2020/03/28]  
21  
22  
23  
24  
25  
26  
27  
28  
29  
30  
31  
32  
33  
34  
35  
36  
37  
38  
39  
40  
41  
42  
43  
44  
45  
46  
47  
48  
49  
50  
51  
52  
53  
54  
55  
56  
57  
58  
59  
60

**Table 1. Demographics of Participants**

| <b>Participant Characteristics (N = 44)</b> | <b>Frequency<br/>(n)</b> | <b>Percentage<br/>(%)</b> |
|---------------------------------------------|--------------------------|---------------------------|
| <b>Age range, years</b>                     |                          |                           |
| 18-25                                       | 19                       | 43.2                      |
| 26-35                                       | 10                       | 22.7                      |
| 36-45                                       | 11                       | 25.0                      |
| 46-64                                       | 4                        | 9.1                       |
| <b>Employment position/ Job title</b>       |                          |                           |
| Security guard                              | 20                       | 45.5                      |
| Field supervisor/administrator              | 7                        | 15.9                      |
| Employers/ company executives               | 5                        | 11.4                      |
| Clinical trial team member                  | 12                       | 27.3                      |
| <b>Trial participants HIV status (n=32)</b> |                          |                           |
| HIV positive                                | 10                       | 31.2                      |
| HIV negative                                | 22                       | 68.8                      |

**Table 2: Narrative quotes of participants' experiences in being part of an ongoing HIV trial during a pandemic**

| Sub-Category                                        | Narrative quotes                                                                                                                                                                                                                                                                                                                                                                                                                                                                                                                             |
|-----------------------------------------------------|----------------------------------------------------------------------------------------------------------------------------------------------------------------------------------------------------------------------------------------------------------------------------------------------------------------------------------------------------------------------------------------------------------------------------------------------------------------------------------------------------------------------------------------------|
| <b>Difficulty accessing treatment facilities</b>    | <i>"I got my results on March 2, 2020 and started taking HIV medication and was told to return for follow-up on April 6, 2020. I selected that hospital because it is close to my workplace but since we are not working now, I am at home and it is too far from the hospital. I have therefore decided to wait until we are released from this lockdown, to go for the medication."</i> (Participant 29, district 2)                                                                                                                       |
| <b>Interruptions in HIV treatment schedule</b>      | <i>"I haven't yet told my wife my HIV status because I wasn't expecting to be tested positive. I have been keeping the ARVs at the office and taking them each morning as soon as I report to work. When companies were closed after the president's speech, I was one of those who was sent on temporary and indefinite unpaid leave. I am now at home and have no way of explaining why I am taking this daily medication. I just threw the tablets away and when I resume my work, I will start afresh."</i> (Participant 01, district 1) |
| <b>Fear of co-infection with COVID-19</b>           | <i>"People have been saying that men and people who have other illnesses are more likely to get infected with COVID-19. Now that I am HIV positive, am I not more likely to get infected? Is HIV considered a pre-existing condition? Are people taking anti-retroviral treatment (ART) more at risk or is it better to continue the treatment?"</i> (Participant 05, district 2)                                                                                                                                                            |
| <b>Incorrect information about COVID-19 and HIV</b> | <i>"Some of our colleagues told us that people who were on ART would get COVID-19 much faster than those who were HIV positive but not on ART. That all one needs to do is eat plenty of fruits and vegetables during this time. When this happened, I stopped taking the medicine for one week. With this lockdown, we are mostly getting information from our friends, it is very unfortunate that many of us stopped taking medicine based on fake information."</i> (Participant 07, district 1)                                         |
| <b>Unforeseen effects of peer</b>                   | <i>"About a month ago, I was talking to some friends and they told me that there was a new drug for COVID-19. Apparently, this anti-viral drug is like the drugs we take for HIV. Although I did not tell them that I have HIV, I</i>                                                                                                                                                                                                                                                                                                        |

1  
2  
3 **information on**  
4 **ART adherence**  
5

*decided to take my drugs faithfully. I hope that this will lower my chance of getting the disease.” (Participant 7, district 1)*

6 **Difficulty in**  
7 **transferring HIV**  
8 **care to new**  
9 **facilities**  
10

*“The lockdown from the government came so suddenly and we rushed to the village. I visited the health centre near my home for condoms and to refill my medicine [ART] for the next month, I was surprised to learn that I cannot just get medication from any hospital. They told me to go back to the place where I usually get my medication. I am now trying to get in touch with the former hospital to see if they can inform this health centre to allow me to pick some drugs.” (Participant 16, district 2)*

11  
12  
13 **Limited HIV**  
14 **treatment support**  
15 **at health facilities**  
16

*“I keep forgetting to take the tablets because I am not used to taking medicine every day. I have also been struggling with some pain in my stomach since I started taking the medications. There are also some changes in my skin, I developed some swellings on my arms, and I needed to show them to my counsellor, but I cannot access the hospital. She asked me to take some pictures and send them to her on the phone, but I do not have a smartphone. I can’t cope with this anymore, I need support.” (Participant 20, district 1)*

17  
18  
19  
20 **Need for PrEP**  
21 **initiation support**  
22

*“My results were negative, but we discussed with the counsellor about starting treatment because of some reasons [PrEP]. I went to the hospital and I received the HIV drugs, but I have not yet started taking them. People told me that there are many side effects, and I do not want to have problems when I am on my own at home. I think I will wait to start treatment until I can easily see the counsellor or the doctor when they open public transport again.” (Participant 5, District 1)*

23  
24  
25  
26  
27  
28  
29  
30 **Transport**  
31 **difficulties**  
32  
33  
34

*“I was told to return for my follow-up visit on March 28, unfortunately by then we were in a lockdown so I couldn’t go to the facility because of the stay-at-home order. About a week later, I was not feeling well and decided to go to the facility to see the counsellor. I started walking from my house at 7:00am and finally got to the hospital at about 11am. After seeing the doctor, it was 2pm and I could not get transport back home. Unfortunately, if I decided to walk, I would have reached home past curfew hours. I therefore decided to stay at the hospital for the night with no beddings since I had not prepared for an overnight visit. The next morning, I walked home again and by the time I got home, I was feeling unwell again and sore all over. After that experience, there was no way I could go to the hospital again.” (Participant 1, District 2)*

1  
2  
3  
4  
5  
6  
7  
8  
9  
10  
11  
12  
13  
14  
15  
16  
17  
18  
19  
20  
21  
22  
23  
24  
25  
26  
27  
28  
29  
30  
31  
32  
33  
34  
35  
36  
37  
38  
39  
40  
41  
42  
43  
44  
45  
46

*"Honestly, it is such a hustle to come all the way to the hospital, I think I can give you all the information over the phone. I told you that my self-test was negative, therefore there is no need to come in person. The line at the Resident District Commissioner's office for a travel permit is so long. It is not worth it. (Participant 20, district 1)*

**Fear of infection  
with COVID-19**

*"I am sorry that I did not come for the follow up visit, but I am worried about the danger of leaving my house. My family and I have been at home the entire month and my wife said that if I come back home then I need to self-isolate for 14 days. If I take that risk and come, then you must provide a substantial allowance for putting myself and my family at risk. I also figured that since I am HIV negative, there is really no need for me to come for any further check-up." (Participant 20, district 1)*

**Limited post-test  
psychosocial  
support**

*"Just a few weeks ago, I took a test, and I was told that I am HIV positive. I still cannot believe it. The counsellor told me that I need to start on treatment [ART] immediately but I still do not believe it. I had started talking with the counsellor who asked us to come back after one month and I have started accepting my fate. However, now that I cannot see her, I feel like I have gone back to a bad state, like how I was when I had just received my results. She calls me regularly, but the network is so poor, and it is impossible to talk about so many things because we stay in a small place with many people now that we are all in the lock-down. I am waiting for this to end then I go back to the hospital for further confirmation. I hope the person who did the first test made a mistake." (Participant 15, district 2)*

---

**Table 3: Narrative quotes of the study team reflections on conducting a clinical trial during a pandemic**

| Category                                  | Narrative quotes                                                                                                                                                                                                                                                                                                                                                                                                                                                                                                                                                                     |
|-------------------------------------------|--------------------------------------------------------------------------------------------------------------------------------------------------------------------------------------------------------------------------------------------------------------------------------------------------------------------------------------------------------------------------------------------------------------------------------------------------------------------------------------------------------------------------------------------------------------------------------------|
| <b>Trial design modifications</b>         | <i>“During this time, several participants travelled back to their villages and homes, which may have reduced the ability to control for ‘contamination’ among the individuals and this could affect our study outcomes. Additionally, the original plan was for in-person follow up visits, but the travel restrictions made this almost impossible. According to the protocol, participants were supposed to receive group pre-test HIV counselling, however, was modified to individual counselling to accommodate the social distancing directives.” (Study team member, 01)</i> |
| <b>Budget and procurement alterations</b> | <i>“For example, we had to procure personal protective equipment (PPE) like masks, aprons and gloves, and educational materials for the prevention of COVID-19. We also procured hand-held infrared temperature monitors, hand sanitizers, and installed handwashing stations for use at each entry point.” (Study team member, 07)</i>                                                                                                                                                                                                                                              |
| <b>Supply chain disruptions</b>           | <i>...public transport, we increased the budgeted transport refund from 10,000 Uganda Shillings (USD 2.65) to 76,000 (USD 20) per participant to cater for private transportation.” (Study team member, 11)</i>                                                                                                                                                                                                                                                                                                                                                                      |
| <b>Human resource considerations</b>      | <i>“Predictably, some of the companies supplying materials for the trial closed and the few that were open were overwhelmed with numbers and resorted to rationing of supplies like PPE. We experienced disruptions in obtaining vital materials like HIVST test kits and were thus unable to continue with crucial elements of our research.” (Study team member, 01)</i>                                                                                                                                                                                                           |
| <b>Human resource considerations</b>      | <i>“...they hired two (2) new COVID-19 personnel responsible for sanitation, screening and for ensuring adherence to recommended infection prevention and control (IPC) guidelines. The new staff hired also trained the rest of us and helped to respond to any queries from the participants regarding COVID-19 as it continually evolved.” (Study team member, 08)</i>                                                                                                                                                                                                            |
|                                           | <i>“The principal investigator made it clear that continuation of field-work was voluntary, and many people opted to work from home. This staffing reduction drastically slowed the trial processes because those of us who stayed had to handle more than one role.” (Study team member, 06)</i>                                                                                                                                                                                                                                                                                    |

1  
2  
3 **Effects of local** *"..the Principal investigator (PI) in consultation with the oversight committee and research team,*  
4 *halted the recruitment of new participants into the study. We also revised and prioritized trial*  
5 **regulations** *outcome measures to collect at each follow-up visit and the participants who were already*  
6 *enrolled were followed up via phone."*  
7 *(Study team member, 02)*  
8  
9 **Loss to follow-up** *"Some of the men lost their jobs during this time and according to the trial eligibility criteria, had to*  
10 *be removed from the study. Others travelled upcountry to rural areas and their phones were*  
11 **of enrolled** *unreachable due to the telecom network challenges. Others simply refused to take my calls or just*  
12 *kept 'rejecting' the call. This made participant follow-up difficult."* (Study team member, 03)  
13 **participants**  
14  
15 **Ethical approvals** *"The trial involved the collection of biological specimens (blood), therefore, each participant was*  
16 *required to don a face mask and wash their hands prior to involvement in any research activities.*  
17 **for protocol** *This was eventually halted as venepuncture invalidated the social distancing guidelines."* (Study  
18 *team member, 11)*  
19 **deviations**  
20  
21 *"Initially, the men were supposed to return for follow-up after 1 and 3 months. However, for those*  
22 *who were already recruited, their follow up visits were right in the middle of the lockdown. We*  
23 *therefore submitted a request for an amendment to the ethics committee to allow us to conduct*  
24 *the follow up visits by phone. Some of the participants were not happy about this because they*  
25 *wanted to discuss some things when they were assured of privacy"* (Study team member, 09)  
26 **Balancing risks** *"We considered the aims of the study vs. the potential for exposure to COVID-19 for everyone*  
27 *involved, the potential for community transmission in the study districts and the staffing strain. We*  
28 **and benefits** *eventually temporarily halted the trial. However, before the temporary closure of the trial, we*  
29 *informed all the study participants and sought informed consent to conduct follow-up via phone*  
30 *calls. We also assigned study counsellors to individual study participants, to offer psychological*  
31 *support and for immediate contact in the event of any adverse events."* (Study team member, 02)  
32  
33  
34  
35  
36  
37  
38  
39  
40  
41  
42  
43  
44  
45  
46



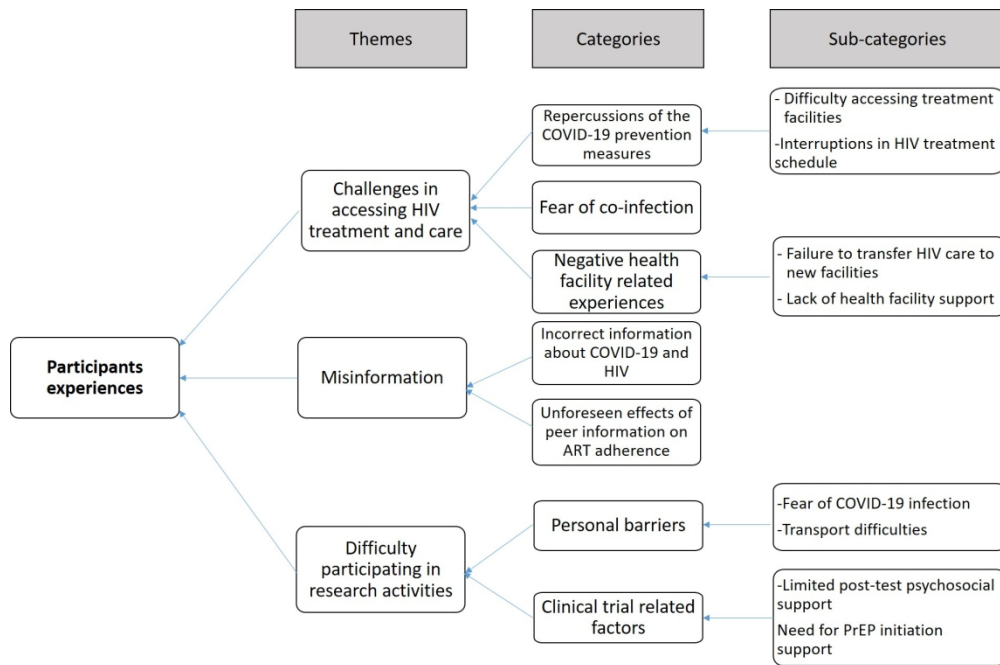

Figure 1: Coding tree for the participants experiences of participating in an ongoing HIV clinical trail during a pandemic

505x333mm (96 x 96 DPI)



1  
2  
3  
4  
5  
6  
7  
8  
9  
10  
11  
12  
13  
14  
15  
16  
17  
18  
19  
20  
21  
22  
23  
24  
25  
26  
27  
28  
29  
30  
31  
32  
33  
34  
35  
36  
37  
38  
39  
40  
41  
42  
43  
44  
45  
46  
47  
48  
49  
50  
51  
52  
53  
54  
55  
56  
57  
58  
59  
60

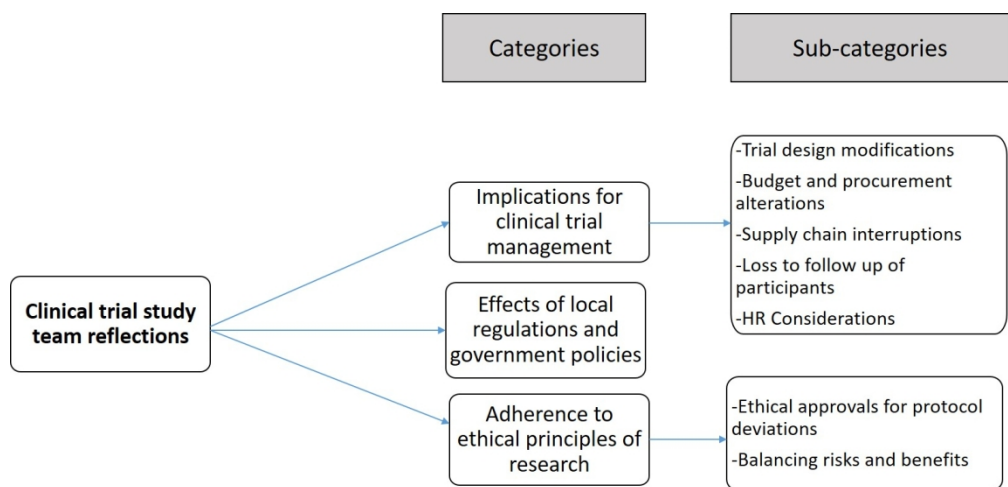

Figure 2: Coding tree for the clinical trial study team of managing an ongoing HIV clinical trail during a pandemic

426x204mm (96 x 96 DPI)

## Supplementary file 1: In-depth interview guide

Before commencing the focus group discussion or In-depth interview, please ensure informed consent is received.

“Hello, my name is \_\_\_\_\_. I work for \_\_\_\_\_. You recently consented to participate in a study about HIV testing at your work premises and this interview is part of the follow-up activities for that study. Your name will not be included in any documents or presentations but we may include the name of this location. If you are uncomfortable with any of this, you are free to opt out of participating now or at any time during the discussion. You can also choose not to answer any of the questions. Please stop me at any time during the interview if you have questions or concerns.

---

### Interview guide for clinical trial participants who received an HIV positive diagnosis

1. What is your experience of participating in this study during the COVID-19 pandemic?
2. What challenges have you faced, if any? How can the study team help you to overcome these challenges?
3. What lessons have you learned while participating in this study during the pandemic?
4. What should we do in future to prevent such challenges and experiences from happening?
5. Have you heard anything about being HIV positive and COVID-19?
6. What actions have you taken since you received your HIV test results? (Probe: personal actions, family actions, disclosure, social actions, behavioural actions, ART)
7. Have you experienced any side-effects from the HIV treatment? How did you manage them? Were there any challenges faced in the management of the side effects?
8. Are there any actions that you did not take related to your HIV care due to the COVID-19 pandemic? What solutions have you found to overcome these challenges?
9. How many doses of the HIV treatment have you missed since the start of the COVID-19 pandemic? Why? How do you suggest that we reach you to provide your treatment during this time?
10. Are you willing to have a nurse counsellor to conduct home visits? What exactly would you like the counsellor to do?

## Interview guide for clinical trial participants who received an HIV negative diagnosis

1. What is your experience of participating in this study during the COVID-19 pandemic?
2. What challenges have you faced, if any? How can the study team help you to overcome these challenges?
3. What lessons have you learned while participating in this study during the pandemic?
4. What should we do in future to prevent such challenges and experiences from happening?
5. Have you heard anything about HIV and COVID-19?
6. What actions have you taken since you received your HIV test results? (Probe: behavioural actions, condom use, VMMC, PrEP)
7. Are there any actions that you did not take related to HIV prevention due to the COVID-19 pandemic? What solutions have you found to overcome these challenges?
8. How do you suggest that we reach you to provide prevention services during this time?

*Thank you for your time and participation, we have learnt a lot from our discussion here today and we hope the time has also been useful to you.*

## Standards for Reporting Qualitative Research (SRQR)

O'Brien B.C., Harris, I.B., Beckman, T.J., Reed, D.A., & Cook, D.A. (2014). Standards for reporting qualitative research: a synthesis of recommendations. *Academic Medicine*, 89(9), 1245-1251.

| No. | Topic                                       | Item                                                                                                                                                                                                                                                                                                                                     | Page |
|-----|---------------------------------------------|------------------------------------------------------------------------------------------------------------------------------------------------------------------------------------------------------------------------------------------------------------------------------------------------------------------------------------------|------|
|     | <b>Title and abstract</b>                   |                                                                                                                                                                                                                                                                                                                                          |      |
| S1  | Title                                       | Concise description of the nature and topic of the study identifying the study as qualitative or indicating the approach (e.g., ethnography, grounded theory) or data collection methods (e.g., interview, focus group) is recommended                                                                                                   | 1    |
| S2  | Abstract                                    | Summary of key elements of the study using the abstract format of the intended publication; typically includes objective, methods, results, and conclusions                                                                                                                                                                              | 2    |
|     | <b>Introduction</b>                         |                                                                                                                                                                                                                                                                                                                                          |      |
| S3  | Problem formulation                         | Description and significance of the problem/phenomenon studied; review of relevant theory and empirical work; problem statement                                                                                                                                                                                                          | 3-5  |
| S4  | Purpose or research question                | Purpose of the study and specific objectives or questions                                                                                                                                                                                                                                                                                | 4    |
|     | <b>Methods</b>                              |                                                                                                                                                                                                                                                                                                                                          |      |
| S5  | Qualitative approach and research paradigm  | Qualitative approach (e.g., ethnography, grounded theory, case study, phenomenology, narrative research) and guiding theory if appropriate; identifying the research paradigm (e.g., positivist, constructivist/interpretivist) is also recommended                                                                                      | 6    |
| S6  | Researcher characteristics and reflexivity  | Researchers' characteristics that may influence the research, including personal attributes, qualifications/experience, relationship with participants, assumptions, or presuppositions; potential or actual interaction between researchers' characteristics and the research questions, approach, methods, results, or transferability | 6    |
| S7  | Context                                     | Setting/site and salient contextual factors; rationale <sup>a</sup>                                                                                                                                                                                                                                                                      | 5    |
| S8  | Sampling strategy                           | How and why research participants, documents, or events were selected; criteria for deciding when no further sampling was necessary (e.g., sampling saturation); rationale <sup>a</sup>                                                                                                                                                  | 5    |
| S9  | Ethical issues pertaining to human subjects | Documentation of approval by an appropriate ethics review board and participant consent, or explanation for lack thereof; other confidentiality and data security issues                                                                                                                                                                 | 6    |
| S10 | Data collection methods                     | Types of data collected; details of data collection procedures including (as appropriate) start and stop dates of data collection and analysis, iterative process, triangulation of sources/methods, and modification of procedures in response to evolving study findings; rationale <sup>a</sup>                                       | 6-8  |

|                         |                                                                                              |                                                                                                                                                                                                                                                                                                       |                    |
|-------------------------|----------------------------------------------------------------------------------------------|-------------------------------------------------------------------------------------------------------------------------------------------------------------------------------------------------------------------------------------------------------------------------------------------------------|--------------------|
| S11                     | Data collection instruments and technologies                                                 | Description of instruments (e.g., interview guides, questionnaires) and devices (e.g., audio recorders) used for data collection; if/how the instrument(s) changed over the course of the study                                                                                                       | 6-7                |
| S12                     | Units of study                                                                               | Number and relevant characteristics of participants, documents, or events included in the study; level of participation (could be reported in results)                                                                                                                                                | 7                  |
| S13                     | Data processing                                                                              | Methods for processing data prior to and during analysis, including transcription, data entry, data management and security, verification of data integrity, data coding, and anonymization/deidentification of excerpts                                                                              | 8                  |
| S14                     | Data analysis                                                                                | Process by which inferences, themes, etc., were identified and developed, including researchers involved in data analysis; usually references a specific paradigm or approach; rationale <sup>a</sup>                                                                                                 | 8                  |
| S15                     | Techniques to enhance trustworthiness                                                        | Techniques to enhance trustworthiness and credibility of data analysis (e.g., member checking, audit trail, triangulation); rationale <sup>a</sup>                                                                                                                                                    | 8                  |
| <b>Results/Findings</b> |                                                                                              |                                                                                                                                                                                                                                                                                                       |                    |
| S16                     | Synthesis and interpretation                                                                 | Main findings (e.g., interpretations, inferences, and themes); might include development of a theory or model, or integration with prior research or theory                                                                                                                                           | 9-17               |
| S17                     | Links to empirical data                                                                      | Evidence (e.g., quotes, field notes, text excerpts, photographs) to substantiate analytic findings                                                                                                                                                                                                    | Table 2<br>Table 3 |
| <b>Discussion</b>       |                                                                                              |                                                                                                                                                                                                                                                                                                       |                    |
| S18                     | Integration with prior work, implications, transferability, and contribution(s) to the field | Short summary of main findings; explanation of how findings and conclusions connect to, support, elaborate on, or challenge conclusions of earlier scholarship; discussion of scope of application/generalizability; identification of unique contribution(s) to scholarship in a discipline or field | 17-21              |
| S19                     | Limitations                                                                                  | Trustworthiness and limitations of findings                                                                                                                                                                                                                                                           | 2, 21              |
| <b>Other</b>            |                                                                                              |                                                                                                                                                                                                                                                                                                       |                    |
| S20                     | Conflicts of interest                                                                        | Potential sources of influence or perceived influence on study conduct and conclusions; how these were managed                                                                                                                                                                                        | 22                 |
| S21                     | Funding                                                                                      | Sources of funding and other support; role of funders in data collection, interpretation, and reporting                                                                                                                                                                                               | 23                 |

<sup>a</sup>The rationale should briefly discuss the justification for choosing that theory, approach, method, or technique rather than other options available, the assumptions and limitations implicit in those choices, and how those choices influence study conclusions and transferability. As appropriate, the rationale for several items might be discussed together.
